1 ***CNTN5*<sup>-/+</sup> or *EHMT2*<sup>-/+</sup> iPSC-Derived**  
2 **Neurons from Individuals with Autism**  
3 **Develop Hyperactive Neuronal Networks**

4  
5 Eric Deneault<sup>1,2</sup>, Muhammad Faheem<sup>1,2</sup>, Sean H. White<sup>3</sup>, Deivid C. Rodrigues<sup>4</sup>,  
6 Song Sun<sup>5,6,8,9</sup>, Wei Wei<sup>4</sup>, Alina Piekna<sup>4</sup>, Tadeo Thompson<sup>4</sup>, Jennifer L. Howe<sup>2</sup>,  
7 Leon Chalil<sup>3</sup>, Vickie Kwan<sup>3</sup>, Susan Walker<sup>1,2</sup>, Peter Pasceri<sup>4</sup>, Frederick P.  
8 Roth<sup>5,6,7,8,9</sup>, Ryan K.C. Yuen<sup>1,2</sup>, Karun K. Singh<sup>3\*</sup>, James Ellis<sup>4,8\*</sup> and Stephen W.  
9 Scherer<sup>1,2,8,9,10\*</sup>

10  
11 <sup>1</sup>Genetics & Genome Biology Program, The Hospital for Sick Children, Toronto, ON, Canada;  
12 <sup>2</sup>The Centre for Applied Genomics, The Hospital for Sick Children, Toronto, ON, Canada; <sup>3</sup>Stem  
13 Cell and Cancer Research Institute, Department of Biochemistry and Biomedical Sciences,  
14 McMaster University, Canada; <sup>4</sup>Developmental & Stem Cell Biology Program, The Hospital for  
15 Sick Children, Toronto, ON, Canada; <sup>5</sup>Lunenfeld-Tanenbaum Research Institute, Mount Sinai  
16 Hospital, Toronto, ON, Canada; <sup>6</sup>The Donnelly Centre, University of Toronto, Toronto, ON,  
17 Canada; <sup>7</sup>Department of Computer Science, University of Toronto, Toronto, ON,  
18 Canada; <sup>8</sup>Department of Molecular Genetics, University of Toronto, Toronto, ON, Canada;  
19 <sup>9</sup>Canadian Institute for Advanced Research (CIFAR), Toronto, ON; <sup>10</sup>McLaughlin Centre,  
20 University of Toronto, Toronto, ON, Canada  
21 \*Co-corresponding senior authors: [singhk2@mcmaster.ca](mailto:singhk2@mcmaster.ca), [jellis@sickkids.ca](mailto:jellis@sickkids.ca),  
22 [stephen.scherer@sickkids.ca](mailto:stephen.scherer@sickkids.ca) (lead contact)

23

24

## 25 **Abstract**

26 Induced pluripotent stem cell (iPSC)-derived cortical neurons are increasingly  
27 used as a model to study developmental aspects of Autism Spectrum Disorder  
28 (ASD), which is clinically and genetically heterogeneous. To study the complex  
29 relationship of rare (penetrant) variant(s) and common (weaker) polygenic risk  
30 variant(s) to ASD, “isogenic” iPSC-derived neurons from probands and family-  
31 based controls, for modeling, is critical. We developed a standardized set of  
32 procedures, designed to control for heterogeneity in reprogramming and  
33 differentiation, and generated 53 different iPSC-derived glutamatergic neuronal  
34 lines from 25 participants from 12 unrelated families with ASD (14 ASD-affected  
35 individuals, 3 unaffected siblings, 8 unaffected parents). Heterozygous *de novo*  
36 (7 families; 16p11.2, *NRXN1*, *DLGAP2*, *CAPRIN1*, *VIP*, *ANOS1*, *THRA*) and  
37 rare-inherited (2 families; *CNTN5*, *AGBL4*) presumed-damaging variants were  
38 characterized in ASD risk genes/loci. In three additional families, functional  
39 candidates for ASD (*SET*), and combinations of putative etiologic variants  
40 (*GLI3/KIF21A* and *EHMT2/UBE2I* combinations in separate families), were  
41 modeled. We used a large-scale multi-electrode array (MEA) as our primary high-  
42 throughput phenotyping assay, followed by patch clamp recordings. Our most  
43 compelling new results revealed a consistent spontaneous network hyperactivity

44 in neurons deficient for *CNTN5* or *EHMT2*. Our biobank of iPSC-derived neurons  
45 and accompanying genomic data are available to accelerate ASD research.

46

47

## 48 **Introduction**

49 The past two decades of research has determined Autism Spectrum Disorders  
50 (ASD) to be clinically (Fernandez and Scherer, 2017, Jones and Lord, 2013,  
51 Mahdi et al., 2018) and genetically (De Rubeis et al., 2014, Gilman et al., 2011,  
52 Pinto et al., 2014, Tammimies et al., 2015, Yuen et al., 2017) heterogeneous.  
53 Phenotypically, the fifth edition of the Diagnostic and Statistical Manual of Mental  
54 Disorders (DSM-5) combines autistic disorder, Asperger disorder, childhood  
55 disintegrative disorder and pervasive developmental disorder not otherwise  
56 specified into the single grouping of ASD (DSM-V, 2013). There are also  
57 syndromic forms of ASD (Carter and Scherer, 2013), and now more than 100  
58 other disorders carrying different names (Betancur, 2011), that in a proportion of  
59 subjects can also present the necessary symptoms for an ASD diagnosis.

60

61 From the perspective of genetics, heritability estimates and family studies  
62 definitely demonstrate genes to be involved (Ronald and Hoekstra, 2011). Single  
63 high-penetrance genes and copy number variation (CNV)-affected loci, have now  
64 been implicated as *bona fide* autism-susceptibility (or risk) genes, although none

65 of them show specificity for ASD alone (Malhotra and Sebat, 2012). These  
66 genetic alterations are rare in the population (<1% population frequency), and in  
67 some individuals, combinations of rare genetic variants affecting different genes  
68 can be involved (Devlin and Scherer, 2012), including more complex structural  
69 alterations of chromosomes (Brandler et al., 2018, Marshall et al., 2008). Recent  
70 research studying common genetic variants indicates polygenic contributors may  
71 be involved, and these can also influence the clinical severity of rare penetrant  
72 variants in ASD risk genes (Weiner et al., 2017).

73

74 Nearly 1,000 putative ASD risk loci are catalogued, with ~100 already being used  
75 in the clinical diagnostic setting (Carter and Scherer, 2013, Winden et al., 2018).  
76 There are some genotype-phenotype associations emerging, including general  
77 trends considering medical complications and IQ (Bishop et al., 2017, Sanders et  
78 al., 2015, Tammimies et al., 2015), sibling variability depending on the ASD gene  
79 variant they carry (Yuen et al., 2015), and lower adaptive ability in those carrying  
80 variants compared to affected siblings without the same genetic change (Yuen et  
81 al., 2017). Many of the ASD risk genes identified are connected into gene  
82 networks including those involved in synaptic transmission, transcriptional  
83 regulation, and RNA processing functions (Bourgeron, 2015, De Rubeis et al.,  
84 2014, Geschwind and State, 2015, Pinto et al., 2014, Sahin and Sur, 2015, Yuen  
85 et al., 2017, Yuen et al., 2016), with the impacted genes being involved in all of  
86 prenatal, region-specific, or broader brain development (Uddin et al., 2014). A  
87 general unifying theme that is emerging from neurophysiologic studies is an

88 increased ratio of excitation and inhibition in key neural systems that can be  
89 perturbed by variants in the ASD risk genes, or environmental variables affecting  
90 the same targets (Canitano and Pallagrosi, 2017).

91  
92 The advent of the induced pluripotent stem cell (iPSC) technology (Takahashi et  
93 al., 2007, Yu et al., 2007), followed by cellular re-programming to forebrain  
94 glutamatergic neurons (Habela et al., 2016), allows accessible cellular models to  
95 be developed for the highly heterogeneous ASD (Beltrao-Braga and Muotri,  
96 2017, Dolmetsch and Geschwind, 2011, Durak and Tsai, 2014, Karmacharya and  
97 Haggarty, 2016, Marchetto et al., 2017, Yoon et al., 2014, Zhang et al., 2013).  
98 Carrying the precise repertoire of rare and common genetic variants as the donor  
99 proband, iPSC-derived neurons represent the best genetic mimic of proband  
100 neurons for functional and mechanistic studies. Induced differentiation can be  
101 achieved with high efficiency and consistency using transient ectopic expression  
102 of the transcription factor NEUROG2 (Ho et al., 2016, Zhang et al., 2013), and  
103 this has been shown useful in diverse phenotyping projects (Deneault et al.,  
104 2018, Pak et al., 2015, Yi et al., 2016). Proband-specific iPSC-derived neuronal  
105 cells indeed provide a useful model to study disease pathology, and response to  
106 drugs, but throughput (both iPSC-derived neurons and phenotyping) is low, with  
107 costs still high. As a result, so far, only a few iPSC-derived neuronal lines are  
108 typically tested in a single study.

109

110 Here, we develop a resource of 53 different iPSC lines derived from 25  
111 individuals with ASD carrying a wide-range of rare variants, and unaffected family  
112 members. We also used clustered regularly interspaced short palindromic  
113 repeats (CRISPR) editing (Jinek et al., 2012, Ran et al., 2013) to create six  
114 “isogenic” pairs of lines with or without mutation, to better assess mutational  
115 impacts. Upon differentiation into cortical excitatory neurons, we investigated  
116 synaptic and electrophysiological properties using the large-scale multi-electrode  
117 array (MEA) as well as more traditional patch-clamp recordings. Numerous  
118 interesting associations were observed between the genetic variants and the  
119 neuronal phenotypes analyzed. We share our general experiences and the  
120 bioresource with the community. We also highlight one of our more robust  
121 findings—an increased neuronal activity in glutamatergic neurons deficient in one  
122 copy of *CNTN5* or *EHMT2*—which could be responsible for ASD-related  
123 phenotypes.

124

125

## 126 **Results**

### 127 **Selection and Collection of Tissue Samples for Reprogramming**

128 Participants were enrolled in the Autism Speaks MSSNG whole-genome  
129 sequencing (WGS) project (Yuen et al., 2017). All ASD and related control-  
130 participants were initially consented for WGS and upon return of genetic results,

131 then consented for the iPSC study, using approved protocols through the  
132 Research Ethics Board at the Hospital for Sick Children. Some families were also  
133 examined by whole exome sequencing. The study took place over a 5-year  
134 period and used incrementally developing ASD gene lists from the following  
135 papers (Jiang et al., 2013, Marshall et al., 2008, Tammimies et al., 2015, Yuen et  
136 al., 2015) (**Table 1**). These primarily considered data from the MSSNG project,  
137 the Autism Sequencing Consortium (De Rubeis et al., 2014), and the Simons  
138 Foundation Autism Research Initiative (SFARI) gene list (discussion below). A  
139 diversity of different ASD-risk variants was targeted ranging in size from 1  
140 nucleotide single nucleotide variants (SNV) to an 823 kb CNV (**Figure 1 and**  
141 **Table 1**; corresponding genomic coordinates in **Table S1**). Typically, one  
142 proband and one sex-matched unaffected member (control) per family were  
143 included (**Figure 1**). In total, 14 probands and 11 controls participated, of which  
144 21 were males and 4 were females (**Figure 1 and Table 1**). Cells from either skin  
145 fibroblasts or CD34+ blood cells were collected for reprogramming into iPSCs  
146 (**Figure 2A and Table 1**).

### 147 **Derivation of iPSC Lines**

148 Two different viral approaches were used for cell reprogramming. For historical  
149 reasons, the first two lines in **Table 1**, namely 19-2 and NR3, were  
150 reprogrammed using retroviruses expressing *OCT4/POU5F1*, *SOX2*, *KLF4* and  
151 *MYC*, and a lentiviral vector that encoded the pluripotency reporter EOS-  
152 GFP/Puro<sup>R</sup> (Hotta et al., 2009). Then, we moved to non-integrative Sendai virus  
153 for all the other tested lines (**Table 1**). Emerging iPSC colonies were selected for

154 activated endogenous human pluripotency markers, differentiation potential into  
155 three germ layer cells after embryoid body formation *in vitro*, and normal  
156 karyotype (**Figure 2B-D** and **Table S2**). Two separate pluripotent and  
157 karyotypically normal iPSC lines were typically selected per participant for  
158 neuronal differentiation and phenotyping experiments (**Table 1**).

### 159 **Transient Induction of Neuronal Differentiation**

160 We induced differentiation of newly generated iPSCs into glutamatergic neurons  
161 to test their electrophysiological properties (**Figure 2A**). We used the NEUROG2  
162 ectopic expression approach since highly-enriched populations of glutamatergic  
163 neurons can be obtained within a week, and they exhibit robust synaptic activity  
164 when co-cultured with glial cells (Zhang et al., 2013). Importantly, we determined  
165 that this strategy offers highly uniform differentiation levels between cell lines  
166 derived from different participants (Deneault et al., 2018). This consistency was  
167 necessary to perform suitable phenotyping assays such as network  
168 electrophysiology recordings of several different lines in the same experimental  
169 batch. The resulting glutamatergic neurons were all subjected to  
170 electrophysiological phenotyping.

### 171 **Multi-Electrode Array Analysis of iPSC-Derived Neurons**

172 MEA phenotyping was predominantly used in order to monitor the excitability of  
173 several independent cultured neuron populations in parallel, and in an unbiased  
174 manner. We sought to determine if any selected ASD-risk variants would  
175 interfere with spontaneous spiking and synchronized bursting activity in a whole  
176 network of interconnected glutamatergic neurons. We ensured that the duration



177 and amplitude of detected spikes were similar to typical mammalian neurons, i.e.,  
178 action potential widths of around 1-2 milliseconds (ms) and peak amplitudes of  
179 approximately 20-150  $\mu$ V (**Figure S1A**). We monitored the weighted mean firing  
180 rate (MFR), which represents the MFR per active electrode, four to eight weeks  
181 post-NEUROG2 induction (PNI), in all control cells, i.e., all unaffected sex-  
182 matched family members from all tested families. After pooling all control  
183 samples together, the highest MFR was observed at week six PNI (**Figure S1A**,  
184 right panel). Hence, we opted to use week six PNI as the common reading time  
185 point for comparison of all cell lines.

186

187 We measured the glutamatergic/GABAergic nature of our cultured neurons  
188 produced using NEUROG2 ectopic expression, which is known to repress  
189 GABAergic differentiation at the advantage of glutamatergic (Roybon et al.,  
190 2010). MFRs were measured upon treatment with different receptor inhibitors. No  
191 substantial change was observed after addition of the GABA receptor inhibitor  
192 PTX (**Figure S1B**), indicating that GABAergic neurons are not appreciably  
193 present in our cultures. However, the MFR was significantly reduced in the  
194 presence of the AMPA receptor inhibitor CNQX while unchanged in untreated  
195 cells (**Figure S1B**). This further suggests that most of the culture was composed  
196 of glutamatergic neurons. All activity was abolished after addition of the sodium  
197 channel blocker TTX (**Figure S1B**), indicating that our human neurons were  
198 expressing functional sodium channels.

199

200 Based on these control experiments, we examined our proband lines, starting  
201 with those identified with a simple set of putative ASD-related variants, e.g.,  
202 *NRXN1*, *CNTN5*, *CAPRIN1*, *VIP*, *ANOS1*, *THRA* and *SET* (**Figure 1 and Table**  
203 **1**). Two main MEA metrics were monitored, i.e., weighted MFR and network burst  
204 frequency, at week six PNI. The heterozygous *CNTN5*-mutant neuron lines 27H  
205 and 27N presented a significantly higher weighted MFR compared with their  
206 related *CNTN5*<sup>+/+</sup> control lines 26E and 26J (**Figure 3A**), indicating an increased  
207 spontaneous spiking activity in glutamatergic neurons. These two lines also  
208 showed a significantly higher network burst frequency (**Figure 3A**), indicating a  
209 more synchronized neuronal activity across each well. Importantly, *CNTN5*  
210 protein levels were reduced by at least 33% in *CNTN5*<sup>+/+</sup> neurons (**Figure 3A**),  
211 suggesting that the 676-kb heterozygous loss in *CNTN5* interferes with the  
212 expression of *CNTN5* protein and may be responsible for higher levels of  
213 neuronal activity.

#### 214 **Isogenic Pair to Control for Genetic Background Contribution**

215 Unaffected gender-matched family members are genetically similar to their  
216 related probands, but still present substantial genetic differences that can  
217 contribute to a given phenotype. Isogenic cell pairs represent better control of the  
218 genetic background contribution (Hoffman et al., 2018). CRISPR editing provides  
219 the possibility to engineer such isogenic controls (Miyaoaka et al., 2014, Powell et  
220 al., 2017). Since editing large CNVs, such as the 676-kb deletion in *CNTN5*, is  
221 currently limited by existing technology, we elected to introduce a set of  
222 nonsense mutations, previously described as “StopTag” (Deneault et al., 2018),

223 to knock out (KO) the expression of this gene in an unrelated iPSC line that was  
224 previously generated from a non-ASD and non-carrier individual. This parental  
225 line “19-2” was also exploited in similar isogenic KO approaches (Woodbury-  
226 Smith et al., 2017a) (Ross et al., submitted; Zaslavsky et al., in revision), allowing  
227 assessment in a different and unrelated genetic background. For technical  
228 reasons, we targeted exon 5 of the transcript ENST00000524871.5 of *CNTN5* in  
229 order to disrupt its expression. A heterozygous iPSC line was isolated to better  
230 mimic the heterozygous status of the *CNTN5* deletion in the proband lines 27H  
231 and 27N. Intriguingly, the new isogenic iPSC-derived neuron line 19-2-  
232 *CNTN5*<sup>StopTag/+</sup> did not show a significant difference in terms of both weighted  
233 MFR and network burst frequency at week six PNI (**Figure 3B**), suggesting that  
234 this different genetic background might contribute to the result. For this validation  
235 set up, we decided to record for longer times, i.e., until 11 weeks PNI.  
236 Interestingly, line 19-2-*CNTN5*<sup>StopTag/+</sup> presented a significant higher weighted  
237 MFR at 10 weeks PNI compared to its control 19-2 (**Figure 3B**). Moreover,  
238 *CNTN5* protein levels were clearly decreased in this isogenic mutant line (**Figure**  
239 **3B**, right panel), implying that StopTag insertion efficiently disrupted gene  
240 expression. These results indicate that loss of *CNTN5* function is responsible for  
241 increased neuronal activity *in vitro*.

242

243 By contrast, iPSC-derived neurons carrying the missense variant R384C in  
244 *THRA* presented a significantly decreased weighted MFR (**Figure 3C**),  
245 suggesting that this variant affects the function of *THRA* protein and limits

246 neuronal activity. No other simple-variant lines presented significant difference in  
247 MEA results compared to their related controls (**Figure S2**). No unaffected  
248 familial control was available to compare with the line NR3, carrying a 430-kb  
249 loss in *NRXN1* (**Figure 1B and Table 1**). For this reason, we averaged the  
250 results obtained from all unrelated controls used in this study, compared it with  
251 line NR3, and obtained no significant differences (**Figure S2A**). Although a  
252 proper genetically-matched control was not available for line NR3, this suggests  
253 that the loss of one *NRXN1* allele does not interfere with control neuronal activity  
254 in this setting.

### 255 **Repair of *ANOS1* Rescues Defective Membrane Currents**

256 In a complementary approach to minimize the confounding effects of genetic  
257 background from familial and unrelated controls, and its impact on phenotype, we  
258 sought to edit our proband-specific variants using CRISPR in order to create  
259 matching isogenic controls. We prioritized genes affected by nonsense variants  
260 such as *CAPRIN1*, *VIP* and *ANOS1* (**Figure 1F-H and Table 1**). For instance,  
261 the nonsense variant R423X found in *ANOS1* in participant 2-1303-003 was  
262 successfully corrected in the corresponding iPSC line 18C (**Figure 4A-C**).  
263 Indeed, after detecting 7% edited cells using droplet digital PCR (ddPCR) in well  
264 G08 in the primary 96-well culture plate post-nucleofection, two subsequent  
265 limiting-dilution enrichment steps were necessary to isolate a 100% corrected  
266 iPSC line (**Figure 4B**). Sanger sequencing confirmed the properly corrected  
267 genomic DNA sequence (**Figure 4C**). This newly corrected line was named  
268 “18CW” (see iPSC line ID “18CW” in **Table 1** and **Figure 4C**).

269

270 Despite a behaviour similar to the unaffected familial control line 19A in terms of  
271 weighted MFR and network burst frequency, the CRISPR-corrected line 18CW  
272 did not exhibit a statistical difference from to its isogenic counterpart 18C (**Figure**  
273 **S2D**). Nonetheless, the availability of such isogenic set prompted us to explore  
274 more detailed electrophysiological properties using patch-clamp recordings of  
275 single neurons in order to reveal any phenotype not detected using MEA. While  
276 the advantage of MEA experiments is that continuous live monitoring of neural  
277 activity can be measured over multiple weeks, we used patch-clamp  
278 electrophysiology on NEUROG2 neurons between days 21-25 PNI. This time  
279 window provides robust recordings to detect phenotypes, as shown in previous  
280 studies (Yi et al., 2016). Furthermore, the increased density of neuronal  
281 processes appearing beyond 4 weeks PNI can preclude consistent clean patch-  
282 clamp recordings, but this is not an issue with MEA. Using this protocol, we  
283 detected significantly lower outward membrane current at 40 mV in the mutant  
284 line 18C compared to its isogenic control 18CW (**Figure 4D**, left panel). A  
285 significantly higher inward current was also observed in mutant neurons between  
286 -40 and 0 mV (**Figure 4D**, left panel). A comparable pattern of outward/inward  
287 current was monitored in a different unrelated isogenic pair (**Figure 4D**, right  
288 panel), in which our StopTag fragment was previously inserted within the *ANOS1*  
289 coding sequence in line 19-2 (Deneault et al., 2018). These results indicate that  
290 *ANOS1*-null iPSC-derived glutamatergic neurons present abnormal sodium and  
291 potassium membrane currents that might contribute to ASD development.

292 Notably, these observations underline that some specific electrophysiological  
293 phenotypes at the single cell level, e.g., membrane currents, may not be  
294 captured when using MEA monitoring at the cell population level.

### 295 **Addressing Complex-Variant Lines**

296 Studying the relationship between ASD in individuals carrying multiple ASD-  
297 relevant variants requires additional considerations. For example, lines 36O and  
298 36P were reprogrammed from participant 7-0058-003 and were each carrying a  
299 323-kb deletion disrupting *AGBL4*, a 243-kb deletion disrupting *TCERG1L*, and a  
300 516-kb duplication encompassing the *GPR148*, *AMER3*, *ARHGEF4*, *FAM168B*,  
301 *POTEE* genes (**Figure 1E and Table 1**). As for line NR3, no unaffected family  
302 member was available as control for lines 36O and 36P, thus we used the “all  
303 control average” and no significant differences were observed in terms of  
304 weighted MFR and network burst frequency (**Figure S3A**). No significant MEA  
305 recording differences were observed with *DLGAP2* (**Figure S3B**) or *GLI3/KIF21A*  
306 (**Figure S3C**) complex-variant mutant lines with respect to their corresponding  
307 familial controls. These results suggest that different expression levels of these  
308 genes do not interfere with control neuronal activity.

309

### 310 **Neuronal Hyperactivity in *EHMT2/UBE2I* Complex-Variant Neurons**

311 Lines 38B and 38E from participant 6-0393-003 carry two ASD-relevant variants;  
312 a missense E78K in *UBE2I* and a frameshift variant K1164Nfs in *EHMT2* (**Figure**  
313 **1L and Table 1**). MEA recordings between weeks 4-8 PNI showed a significantly  
314 higher weighted MFR and network burst frequency compared to their familial

315 control line 37E (**Figure 5A**). To ensure that this hyperactivity was synaptic and  
316 not only intrinsic to the neurons, we performed patch-clamp recordings, at day  
317 21-25 PNI to avoid the increased density of neuronal processes that impacts the  
318 ability to obtain clean recordings, as stated previously. Intrinsic properties, e.g.,  
319 capacitance and resistance, did not vary significantly (**Figure 5B**), indicating  
320 comparable maturity levels between lines 37E and 38E. While spontaneous  
321 excitatory post-synaptic current (sEPSC) amplitude was unchanged, sEPSC  
322 frequency was significantly higher in mutant neurons compared to controls  
323 (**Figure 5B**). These observations suggest that a potential loss-of-function of  
324 *UBE2I* and/or *EHMT2* is involved in ASD-related neuronal dysfunction.

### 325 **Evidence of Functional Impact of *EHMT2*, but not *UBE2I* Variants**

326 Since our attempts to edit the variants E78K in *UBE2I* and K1164Nfs in *EHMT2*  
327 had not been successful, we sought to determine the potential contribution of  
328 E78K in *UBE2I* to the observed synaptic hyperactivity. To estimate the damaging  
329 potential of this missense variant on the function of UBE2I protein, we utilized a  
330 *Saccharomyces cerevisiae* complementation assay that was previously  
331 developed as a validated surrogate genetic system to predict the pathogenicity of  
332 diverse human variants (Sun et al., 2016). In this assay, lethality of a  
333 temperature-sensitive allele of the yeast *UBC9* gene (ortholog of human *UBE2I*)  
334 is rescued by expressing a functional version of human UBE2I. Several missense  
335 variants in *UBE2I* have been accurately predicted as deleterious at conserved  
336 positions, or benign at other positions (Zhang et al., 2017). Therefore, we used  
337 this complementation assay to test the consequence of our variant E78K, and

338 found no effect of this variant on the function of human UBE2I (**Figure S4**).

339 Because these results disfavor involvement of the *UBE2I* variant E78K in the

340 neuronal hyperactivity observed in **Figure 5A-B**, we excluded *UBE2I* from

341 subsequent experiments and further explored a potential causal link between

342 *EHMT2* and synaptic activity.

343

344 Interestingly, evaluation of EHMT2 protein abundance revealed a clear decrease

345 in the mutant lines 38B and 38E, as compared to the control 37E (**Figure 5C**).

346 This suggests that a reduced expression of *EHMT2* increases spontaneous

347 spiking activity and sEPSC frequency of glutamatergic neurons.

#### 348 ***EHMT2*<sup>-/+</sup> CRISPR-Isogenic Pair Confirms Neuronal Hyperactivity**

349 Since the prediction of damage extent of the frameshift variant K1164Nfs on the

350 function of EHMT2 may not be accurate, we used our StopTag insertion strategy

351 in iPSC line 19-2, and targeted exon 20 of the transcript ENST00000375537.8 of

352 *EHMT2* in order to disrupt its expression. In this new isogenic line, weighted MFR

353 and network burst frequency were also significantly increased in iPSC-derived

354 19-2-*EHMT2*<sup>StopTag/+</sup> neurons compared to control 19-2, around week 9 PNI and

355 beyond (**Figure 5D**). This increased activity in mutant neurons occurred later

356 than that observed in the familial lines 38B/E, possibly due to different genetic

357 backgrounds. Accordingly, EHMT2 protein levels were reduced by half in mutant

358 cells (**Figure 5E**). We also performed patch-clamp recordings on these neurons

359 at day 21-25 PNI, as above. We did not detect any significant change in sEPSC

360 frequency and amplitude at this earlier time point compared to the MEA



361 experiment. However, intrinsic properties showed a significant increase in  
362 capacitance and a lower resting membrane potential in mutant cells (**Figure S5**).  
363 These observations suggest that the mutant neurons at 3-4 weeks PNI potentially  
364 have a faster maturation rate, however this phenotype is most pronounced in the  
365 hyperactivity recorded by MEAs later at 9-11 weeks PNI. These results support  
366 the conclusion that inactivation of one allele of *EHMT2* significantly increases  
367 spontaneous network activity of excitatory neurons, with possible effects on the  
368 neuronal maturation process.  
369  
370

## 371 Discussion

372 In order to establish a scalable iPSC-derived neuron paradigm to study ASD, we  
373 selected 12 well-characterized families bearing assumed etiologic variants in  
374 ASD-relevant genes, and loci. Per family, we established one to four different  
375 fully-characterized and normal iPSC lines from typically one individual with ASD,  
376 and one unaffected (non-ASD) gender-matched member. Simultaneous multi-line  
377 electrophysiological evaluation revealed hyperactivity of the simple-variant  
378 *CNTN5*<sup>-/+</sup> iPSC-derived glutamatergic neurons in two independent genetic  
379 backgrounds. Moreover, isogenic-MEA and patch-clamp recordings confirmed  
380 synaptic hyperactivity of iPSC-derived neurons with disruptive mutations in  
381 *EHMT2*, also in two different genetic backgrounds.

382

383 To increase the modeling scalability of complex genetic disorders such as ASD  
384 while optimizing statistical power, several parameters require careful  
385 consideration. Given substantial variation in reprogramming and neuronal  
386 differentiation efficiencies, sample size is important to control. It was recently  
387 proposed that inter-individual variation, i.e., the number of probands with similar  
388 genetic variants, is more important to consider than intra-individual variation, i.e.,  
389 the number of iPSC clones derived from the same individual (Hoffman et al.,  
390 2018). Aiming at multi-variant phenotyping, we tested one or two probands per  
391 deficient gene, however, we were able to create an isogenic pair in a different  
392 genetic background for the two highly relevant genes, i.e., *CNTN5* (Lionel et al.,  
393 2011, Mercati et al., 2017, van Daalen et al., 2011) and *EHMT2* (Deimling et al.,  
394 2017, Kleefstra et al., 2005, Zylicz et al., 2015), thereby controlling inter-  
395 individual variation. We derived two independent iPSC clones per participants to  
396 regulate intra-individual variation. Another important parameter to consider is the  
397 cellular homogeneity of neuronal cultures. We preferred to use the NEUROG2  
398 system over classic dual-SMAD inhibition protocols because we believe it  
399 represents an advantage in terms of cellular homogeneity. It is also much faster  
400 than classic protocols and produces much higher proportion of glutamatergic  
401 neurons that can be studied for ASD (Canitano and Pallagrosi, 2017, Habela et  
402 al., 2016) or other neurological disorders (Lin et al., 2018).

403

404 *NRXN1* (Neurexin 1) is a cell-surface receptor involved in synapse formation and  
405 neurotransmission, and was associated with neurodevelopmental disorders with  
406 variable penetrance (Tammimies et al., 2015, Woodbury-Smith et al., 2017b). In  
407 a mouse knockout model, *Nrxn1* was not essential for excitatory synaptic  
408 transmission in cortical neurons, but a significant decrease in mEPSC frequency  
409 was observed in a human conditional knockout cell model without change in  
410 synapse numbers (Pak et al., 2015). We expected a decreased weighted MFR in  
411 **Figure S2A** since our 430-kb deletion disrupts most of the gene and its isoforms,  
412 however, we did not detect any significant MEA recordings. Nonetheless, in this  
413 instance, no corresponding familial control was available. *DLGAP2* (Discs Large  
414 Associated Protein 2) is a major scaffold protein in the post-synaptic density  
415 involved in synapse organization and neuronal signaling, and was previously  
416 associated with ASD (Marshall et al., 2008). In a mouse model, *Dlgap2* knockout  
417 was responsible for a reduction in GluR1 expression and neuronal spine density  
418 in the cerebral cortex, and a decreased mEPSC peak amplitude (Jiang-Xie et al.,  
419 2014). Our model involved a partial duplication of *DLGAP2* instead of a deletion  
420 and no significant results were obtained in our MEA settings, suggesting that this  
421 variant had no impact on DLGAP2 protein levels or that the impact is not  
422 damaging. *CAPRIN1* (Cell Cycle Associated Protein 1) is an RNA-binding protein  
423 involved in proliferation, migration and synaptic plasticity in neurons, and a  
424 nonsense variant was identified in a family with ASD (Jiang et al., 2013). A  
425 significant reduction in dendrite length and spine density was measured in  
426 *Caprin1* knockdown mouse cultured cortical neurons (Shiina and Nakayama,

427 2014). In neurons from *Caprin1*<sup>-/-</sup> mice, the frequency and amplitude of mEPSCs  
428 was not altered, but the halfwidth of mEPSCs was significantly decreased (Shiina  
429 et al., 2010). In addition, a reduced GluR1 expression was detected in primary  
430 cortical neurons from *Caprin1*<sup>-/-</sup> mice (Ohashi et al., 2016). MEA experiments did  
431 not reveal any significant differences with our *CAPRIN1*<sup>+/-</sup> proband-derived  
432 neurons, suggesting that neuronal activity might not be strongly affected by the  
433 loss of only one *CAPRIN1* allele.

434

435 *ANOS1* (Anosmin 1) is a glycoprotein of the extracellular matrix including four  
436 consecutive fibronectin type III domains. Loss-of-function variants in *ANOS1*  
437 were shown to cause the Kallmann syndrome, which is characterized by  
438 congenital hypogonadotropic hypogonadism associated with anosmia, delayed  
439 puberty and infertility (Dode and Hardelin, 2009). Defects in the migration of  
440 gonadotropin-releasing hormone (GnRH) neurons were observed during  
441 embryonic development, as well as morphological changes in the basal forebrain  
442 cortex (Manara et al., 2014). *ANOS1* expression was detected in projecting  
443 neurons and interneurons in the cerebral cortex throughout layers II to VI in rat  
444 brains at postnatal day 0 to 15 (Clemente et al., 2008). In human, a proband  
445 carrying the nonsense variant R423X in *ANOS1*, and presenting clinical  
446 hypogonadotropic hypogonadism, was also diagnosed with ASD (Jiang et al.,  
447 2013), suggesting a link between *ANOS1* and ASD. Despite the absence of  
448 significant MEA results, neuronal membrane current defects were validated using  
449 patch-clamp recordings in two unrelated isogenic pairs (**Figure 4D**). These

450 results indicate that glutamatergic neuron activity is also influenced by *ANOS1*,  
451 which represents a risk gene for ASD. Future studies on iPSC-NEUROG2  
452 neurons will benefit from both MEA and patch-clamp electrophysiology  
453 approaches, to uncover subtle deficits.

454

455 *CNTN5* (Contactin 5) is an immunoglobulin cell adhesion molecule, with four  
456 fibronectin type III domains, involved in neurite outgrowth and axon connection in  
457 cortical neurons, and was associated with ASD (van Daalen et al., 2011).  
458 Different CNVs affecting *CNTN5* have been associated with ASD and ADHD,  
459 with increased occurrence of hyperacusis (Lionel et al., 2011, Mercati et al.,  
460 2017). Expression of *Cntn5* mRNA was detected in cortical layer IV in mice  
461 (Kleijer et al., 2018). Moreover, *Cntn5* is expressed in glutamatergic neurons of  
462 the central auditory system in mice during the first postnatal week, and knockout  
463 of *Cntn5* expression altered synapse formation (Toyoshima et al., 2009). The  
464 molecular mechanisms through which heterozygous loss of *CNTN5* increases  
465 neuronal activity *in vitro* (**Figure 3A-B**) remains to be elucidated. Gene editing of  
466 the 676-kb deletion, as found in lines 27H and 27N (**Figure 1D and Table 1**), to  
467 obtain isogenic controls may be challenging due to the size, but this approach  
468 might eventually be applied.

469

470 Using a yeast complementation assay (**Figure S4**), we estimated the missense  
471 variant E78K in *UBE3I* not responsible for the electrophysiological phenotypes  
472 observed in participant 6-0393-003 (**Figure 5A-B**). These results prompted us to

473 investigate further on the potential role of the frameshift variant K1164Nfs in  
474 *EHMT2*. *EHMT2* (G9a) is a histone methyltransferase (HMTase) that forms a  
475 complex with *EHMT1* (GLP) to catalyze mono- and dimethylation of lysine 9 on  
476 histone H3 (H3K9me1/2) (Rice et al., 2003). Of note, *EHMT1* protein sequence is  
477 highly similar to *EHMT2* (Deimling et al., 2017). Actually, *EHMT1*  
478 haploinsufficiency is involved in intellectual disability (ID) and ASD as part of the  
479 Kleefstra syndrome (Kleefstra et al., 2005). *EHMT2* represses pluripotency genes  
480 in embryonic stem cells (Zylicz et al., 2015) and potentially acts as both repressor  
481 of neural progenitor genes and activator of neuronal differentiation genes in early  
482 neurodevelopment (Deimling et al., 2017). The impact of the single base deletion  
483 in *EHMT2* (K1164Nfs) on the protein function remains to be determined (see  
484 Table 1 for details). The frameshift is computationally predicted to extend the  
485 protein rather than truncating it, by utilizing sequence in the 3'UTR. However, it is  
486 located exactly at the beginning of the post-SET domain, i.e., at position 1164 of  
487 *EHMT2*. The resulting change in the downstream protein sequence completely  
488 disrupts three conserved cysteine residues in the post-SET domain that normally  
489 form a zinc-binding site with a fourth conserved cysteine close to the SET domain  
490 (Zhang et al., 2003). Since these three conserved cysteine residues are essential  
491 for HMTase activity, as replacement with serine abolished HMTase activity  
492 (Zhang et al., 2002), we suspect that this HMTase activity of *EHMT2* is defective  
493 in our mutant glutamatergic neurons and potentially related to the observed  
494 hyperactivity (**Figure 5**). Upon further validation experiment using a CRISPR-  
495 derived isogenic system and an unrelated genetic background (**Figure 5D**), we

496 propose that *EHMT2* impacts the synaptic function of glutamatergic neurons  
497 through H3K9me1/2 catalyzing ability. Further experiments might clarify this  
498 possibility, such as CRISPR-correction of the K1164Nfs point mutation in lines  
499 38B and 38E to obtain isogenic controls.

500

501 Overall, this study highlights a way to improve the scalability of testing multiple  
502 iPSC-derived neuronal lines with various ASD-risk variants from diverse  
503 probands. Furthermore, our work demonstrates that for future studies to capture  
504 and characterize the electrophysiological impact of ASD variants on human  
505 iPSC-NEUROG2 neurons, it is most beneficial to include both MEA and patch-  
506 clamp experiments, across multiple time points. This work also revealed that  
507 inactivation of at least one allele of *CNTN5* or *EHMT2* intensifies significantly  
508 excitatory neuron synaptic activity *in vitro*. Such phenotype offers the possibility  
509 to implement NEUROG2-based high-throughput drug screening strategies  
510 (Cheng et al., 2017) combining MEA (Tukker et al., 2018) and lines 38B/38E for  
511 instance, to discover molecules that will compensate for neuronal hyperactivity.

512

513

## 514 **Materials and Methods**

## 515 **Skin Fibroblasts Culture**

516 Under the approval of the Canadian Institutes of Health Research Stem Cell  
517 Oversight Committee, all iPSCs were generated from dermal fibroblasts or  
518 CD34+ blood cells. Skin-punch biopsies were obtained from the upper back area  
519 by a clinician at The Hospital for Sick Children. Samples were immersed in 14 ml  
520 of ice-cold Alpha-MEM (Wisent Bioproducts) supplemented with penicillin 100  
521 Units/ml and streptomycin 100 µg/ml (ThermoFisher), and transferred  
522 immediately to the laboratory at The Centre for Applied Genomics (TCAG). Each  
523 biopsy was cut into ~1mm<sup>3</sup> pieces with disposable scalpel in a 60-mm dish. 5 ml  
524 of collagenase 1 mg/ml (Sigma, Canada) was added and the dish was placed in  
525 37°C incubator for 1:45 hours. Skin pieces and collagenase were then  
526 transferred to a 15-ml tube, and centrifuged at 300 g for 10 minutes. Supernatant  
527 was removed, 5 ml of trypsin 0.05%/EDTA 0.53 mM (Wisent Bioproducts) was  
528 added, and the mix was pipetted up and down several times to break up tissue  
529 and placed in 37°C incubator for 30 minutes. After incubation, the mix was  
530 centrifuged at 300 g for 10 minutes, and supernatant was removed leaving 1 ml.  
531 The pellet was pipetted up and down vigorously to break to the pieces without  
532 creating bubbles. The mix was transferred in a T-12.5 flask along with 5 ml of  
533 Alpha-MEM, 15% Fetal Bovine Serum (FBS; Wisent Bioproducts), penicillin 100  
534 Units/ml and streptomycin 100 µg/ml (ThermoFisher), and placed in 37°C  
535 incubator for about a week until 100% confluence. Cultured cells were fed every  
536 5-7 days if not confluent. Once confluent, cells were passed into three 100 mm  
537 dishes to expand, and frozen in liquid nitrogen.



### 538 **Reprogramming Fibroblasts Using Integrative Virus**

539 Reprogramming of skin fibroblasts was performed using retroviral and lentiviral  
540 vectors. Retroviral vectors encoding *POU5F1*, *SOX2*, *KLF4*, *MYC*, and lentiviral  
541 vectors encoding the pluripotency reporter EOS-GFP/Puro<sup>R</sup> were used and  
542 obtained as described (Hotta et al., 2009).

### 543 **Reprogramming Fibroblasts Using Non-Integrative Sendai Virus**

544 Reprogramming of fibroblasts via Sendai virus was performed at the Centre for  
545 Commercialization of Regenerative Medicine (CCRM) using CytoTune™-iPS 2.0  
546 Sendai Reprogramming Kit (ThermoFisher). Fibroblasts were cultured in  
547 fibroblast expansion media (Advanced DMEM; 10% FBS; 1X L-Glutamine; 1X  
548 pen/strep – Thermo Fisher). The desired number of wells for reprogramming from  
549 a 24-well plate was coated with 0.1% gelatin. Fibroblasts were dissociated using  
550 Trypsin (ThermoFisher) and allowed to settle overnight. Virus multiplicity of  
551 infection (MOI) was calculated and viruses combined according to number of  
552 cells available for reprogramming and manufacturer's protocol. 24 hours after  
553 transduction, media was changed to wash away viruses. Media was additionally  
554 changed on day 3 and 5 after transduction. 6 days after transduction, 6-well  
555 plates were coated with Matrigel™(Corning). Cells were removed from the 24-  
556 well plate using Accutase (ThermoFisher) and plated on Matrigel in expansion  
557 media. 24 hours later, media was replaced with E7 media  
558 (StemCellTechnologies). Cells were monitored and fed daily with E7. Once  
559 colonies were of an adequate size and morphology to pick, individual colonies  
560 were picked and plated into E8 media (StemCellTechnologies). Clones growing

561 well were further expanded and characterized using standard assays for  
562 pluripotency, karyotyping, genotyping and mycoplasma testing. Directed  
563 differentiation was performed using kits for definitive endoderm, neural and  
564 cardiac lineages (all ThermoFisher).

### 565 **Peripheral Blood Mononuclear Cells (PBMCs) Isolation from**

### 566 **Peripheral Blood and Enrichment of CD34+ Cells**

567 Whole peripheral blood was processed at CCRM using Lymphoprep™  
568 (StemCellTechnologies) in a SepMate™ tube (StemCellTechnologies) according  
569 to manufacturer's instructions. The sample was centrifuged (10 min at 1200 g).  
570 The top layer containing PBMCs was collected and mixed with 10 mL of the  
571 PBS/FBS mixture and centrifuged (8 min at 300 g). The PBMC's collected at the  
572 bottom of the tube were washed, counted and resuspended in PBS/FBS mixture.  
573 CD34+ cells were then isolated using the Human Whole Blood/Buffy Coat CD34+  
574 Selection kit according to manufacturer's instructions (StemCellTechnologies).  
575 Isolated cells were expanded in StemSpan SFEM II media  
576 (StemCellTechnologies) and StemSpan CD34+ Expansion Supplements  
577 (StemCellTechnologies) prior to reprogramming.

### 578 **Reprogramming PBMC Using Non-Integrative Sendai Virus**

579 Reprogramming of CD34+ PBMCs was performed at CCRM using CytoTune™-  
580 iPS 2.0 Sendai Reprogramming Kit. Expanded cells were spun down and  
581 resuspended in StemSpan SFEM II media and StemSpan CD34+ Expansion  
582 Supplements, and placed in a single well of a 24-well dish. Virus MOI was  
583 calculated and viruses combined according to number of cells available for

584 reprogramming and manufacturer's protocol. The virus mixture was added to  
585 cells, and washed off 24 hours after infection. 48 hours after viral delivery, cells  
586 were plated in 6-well plates in SFII and transitioned to ReproTESR for the  
587 duration of reprogramming. Once colonies were of an adequate size and  
588 morphology to pick, individual colonies were picked and plated into E8. Clones  
589 growing well were further expanded and characterized as explained above.

### 590 **iPSCs Maintenance**

591 All iPSC lines were maintained on matrigel (Corning) coating, with complete  
592 media change every day in mTeSR™ (StemCellTechnologies). ReLeSR™  
593 (StemCellTechnologies) was used for passaging. Accutase™  
594 (InnovativeCellTechnologies) and 10 μM Rho-associated kinase (ROCK) inhibitor  
595 (Y-27632; StemCellTechnologies) were used for single-cell dissociation  
596 purposes.

### 597 **Gene Editing**

598 For point mutation correction in 18C line, we used the type II CRISPR/Cas9  
599 double-nicking (Cas9D10A) system with two guide RNA (gRNAs) to reduce off-  
600 target activity. We devised the gRNA sequences using tools available at  
601 <http://crispr.mit.edu/>. We designed a HDR-based method using a synthesized  
602 single-stranded oligonucleotide (ssODN) template to replace the point mutation  
603 with the reference nucleotide. To prevent damage to the correct sequence, a  
604 silent mutation was introduced in the ssODN close to the proto-adjacent motif  
605 (PAM) of the reverse gRNA (gRNA-), which commands Cas9D10A to nick the  
606 plus strand, given that ssODN was synthesized as plus strand. All the CRISPR

607 machinery was introduced into iPSC by nucleofection. Screening for correction of  
608 the appropriate base pair was based on absolute quantification of allele  
609 frequency using droplet digital PCR (ddPCR). Enrichment of corrected cells was  
610 obtained through sib-selection step cultures in 96-well plate format, as adapted  
611 from (Miyaoaka et al., 2014), until a well containing 100% of corrected alleles was  
612 identified. For insertion of premature stop codon in 19-2 cells, ribonucleoprotein  
613 (RNP) complex was used as a vector to deliver the CRISPR machinery, along  
614 with one sgRNA and Cas9 nuclease, for each target gene. Design of sgRNA and  
615 ssODN for HDR, nucleofection and isolation of edited lines were described  
616 (Deneault et al., 2018).

### 617 **Lentivirus Production**

618  $7.5 \times 10^6$  HEK293T cells were seeded in a T-75 flask, grown in 10% fetal bovine  
619 serum in DMEM (Gibco). The next day, cells were transfected using  
620 Lipofectamine 2000 with plasmids for gag-pol (10  $\mu$ g), rev (10  $\mu$ g), VSV-G (5  $\mu$ g),  
621 and the target constructs FUW-TetO-Ng2-P2A-EGFP-T2A-puromycin or FUW-  
622 rtTA (15  $\mu$ g; gift from T.C. Südhof laboratory) (Zhang et al., 2013). Next day, the  
623 media was changed. The day after that, the media was spun down in a high-  
624 speed centrifuge at 30,000 g at 4°C for 2 hours. The supernatant was discarded  
625 and 50  $\mu$ l PBS was added to the pellet and left overnight at 4°C. The next day,  
626 the solution was triturated, aliquoted and frozen at -80°C.

### 627 **Differentiation into Glutamatergic Neurons**

628  $5 \times 10^5$  iPSCs/well were seeded in a matrigel-coated 6-well plate in 2 ml of mTeSR  
629 supplemented with 10  $\mu$ M Y-27632. Next day, media in each well was replaced

630 with 2 ml fresh media plus 10  $\mu$ M Y-27632, 0.8  $\mu$ g/ml polybrene (Sigma), and the  
631 minimal amount of NEUROG2 and rtTA lentiviruses necessary to generate 100%  
632 GFP+ cells upon doxycycline induction, depending on prior titration of a given  
633 virus batch. The day after, virus-containing media were replaced with fresh  
634 mTeSR, and cells were expanded until near-confluency. Newly generated  
635 “NEUROG2-iPSCs” were detached using accutase, and seeded in a new  
636 matrigel-coated 6-well plate at a density of  $5 \times 10^5$  cells per well in 2 ml of mTeSR  
637 supplemented with 10  $\mu$ M Y-27632 (day 0 of differentiation). Next day (day 1),  
638 media in each well was changed for 2 ml of CM1 [DMEM-F12 (Gibco), 1x N2  
639 (Gibco), 1x NEAA (Gibco), 1x pen/strep (Gibco), laminin (1  $\mu$ g/ml; Sigma), BDNF  
640 (10 ng/ $\mu$ l; Peprotech) and GDNF (10 ng/ $\mu$ l; Peprotech) supplemented with fresh  
641 doxycycline hyclate (2  $\mu$ g/ml; Sigma) and 10  $\mu$ M Y-27632. The day after (day 2),  
642 media was replaced with 2 ml of CM2 [Neurobasal media (Gibco), 1x B27  
643 (Gibco), 1x glutamax (Gibco), 1x pen/strep, laminin (1  $\mu$ g/ml), BDNF (10 ng/ $\mu$ l)  
644 and GDNF (10 ng/ $\mu$ l)] supplemented with fresh doxycycline hyclate (2  $\mu$ g/ml) and  
645 puromycin (5  $\mu$ g/ml for 19-2-derived cells, and 2  $\mu$ g/ml for 50B-derived cells;  
646 Sigma). Media was replaced with CM2 supplemented with fresh doxycycline  
647 hyclate (2  $\mu$ g/ml). The same media change was repeated at day 4. At day 6,  
648 media was replaced with CM2 supplemented with fresh doxycycline hyclate (2  
649  $\mu$ g/ml) and araC (10  $\mu$ M; Sigma). Two days later, these day 8 post-NEUROG2-  
650 induction (PNI) neurons were detached using accutase and ready to seed for  
651 subsequent experiments, as described below.

652 **Multi-electrode array (MEA)**

653 48-well opaque-bottom MEA plates (Axion Biosystems) were coated with filter-  
654 sterilized 0.1% polyethyleneimine solution in borate buffer pH 8.4 for 1 hour at  
655 room temperature, washed four times with water, and dried overnight. 120,000  
656 “day8-dox” neurons/well were seeded in 250  $\mu$ l CM2 media. The day after, 5,000  
657 mouse astrocytes/well were seeded on top of neurons in 50  $\mu$ l/well CM2 media.  
658 Astrocytes were prepared from postnatal day 1 CD-1 mice as described (Kim and  
659 Magrane, 2011). Media was half-changed once a week with CM2 media. Every  
660 week post-seeding, the electrical activity of the MEA plates was recorded using  
661 the Axion Maestro MEA reader (Axion Biosystems). The heater control was set to  
662 warm up the reader at 37°C. Each plate was first incubated for 5 minutes on the  
663 pre-warmed reader, then real-time spontaneous neural activity was recorded for  
664 5 minutes using AxIS 2.0 software (Axion Biosystems). A bandpass filter from  
665 200 Hz to 3 kHz was applied. Spikes were detected using a threshold of 6 times  
666 the standard deviation of noise signal on electrodes.  
667 Offline advanced metrics were re-recorded and analysed using Axion Biosystems  
668 Neural Metric Tool. An electrode was considered active if at least 5 spikes were  
669 detected per minute. Single electrode bursts were identified as a minimum of 5  
670 spikes with a maximum interspike interval (ISI) of 100 milliseconds. Network  
671 bursts were identified as a minimum of 10 spikes with a maximum ISI of 100  
672 milliseconds covered by at least 25% of electrodes in each well. No non-active  
673 well was excluded in the analysis. After the last reading, each well was treated  
674 with three synaptic antagonists: GABA<sub>A</sub> receptor antagonist picrotoxin (PTX;

675 Sigma) at 100  $\mu$ M, AMPA receptor antagonist 6-cyano-7-nitroquinoxaline-2,3-  
676 dion (CNQX; Sigma) at 60  $\mu$ M, and sodium ion channel antagonist tetrodotoxin  
677 (TTX; Alomone labs) at 1  $\mu$ M. The plates were recorded consecutively, 5-10  
678 minutes after addition of the antagonists. A 60-minute recovery period was  
679 allowed in the incubator at 37°C between each antagonist treatment and plate  
680 recording.

### 681 **Patch-Clamp Recordings**

682 Day 3 PNI neurons were replated at a density of 100 000/well of a poly-  
683 ornithin/laminin coated coverslips in a 24-well plate with CM2 media. On day 4,  
684 50 000 mouse astrocytes were added to the plates and cultured until day 21-28  
685 PNI for recording. At day 10, CM2 was supplemented with 2.5% FBS in  
686 accordance with (Zhang et al., 2013). Whole-cell recordings (BX51WI; Olympus)  
687 were performed at room temperature using an Axoclamp 700B amplifier  
688 (Molecular Devices) from borosilicate patch electrodes (P-97 puller; Sutter  
689 Instruments) containing a potassium-based intracellular solution (in mM): 123 K-  
690 gluconate, 10 KCL, 10 HEPES; 1 EGTA, 2 MgCl<sub>2</sub>, 0.1 CaCl<sub>2</sub>, 1 Mg.ATP, and 0.2  
691 Na<sub>4</sub>GTP (pH 7.2). 0.06% sulpharhodamine dye was added to select neurons for  
692 visual confirmation of multipolar neurons. Composition of extracellular solution  
693 was (in mM): 140 NaCl, 2.5 KCl, 1 1.25 NaH<sub>2</sub>PO<sub>4</sub>, 1 MgCl<sub>2</sub>, 10 glucose, and 2  
694 CaCl<sub>2</sub> (pH 7.4). Whole cell recordings were clamped at -70 mV using Clampex  
695 10.6 (Molecular Devices), corrected for a calculated -10 mV junction potential  
696 and analyzed using the Template Search function from Clampfit 10.6 (Molecular  
697 Devices). Following initial breakthrough and current stabilization in voltage clamp,

698 the cell was switched to current clamp to monitor initial spiking activity and record  
699 the membrane potential (cc=0, ~1 min post-breakthrough). Bias current was  
700 applied to bring the cell to ~70 mV whereby increasing 5 pA current steps were  
701 applied (starting at -20 pA) to generate the whole cell resistance and to elicit  
702 action potentials. Data were digitized at 10 kHz and low-pass filtered at 2 kHz.  
703 Inward and outward currents were recorded in whole-cell voltage clamp in  
704 response to consecutive 10 mV steps from -90 mV to +40 mV.

### 705 **Yeast Complementation Assay**

706 The method for the yeast complementation assay was described previously (Sun  
707 et al., 2016).

### 708 **Antibodies and Western Blotting**

709 Cells were washed in ice-cold PBS and total protein was extracted in RIPA  
710 supplemented with proteinase inhibitor cocktail, and homogenized. Equivalent  
711 protein mass was loaded on gradient SDS-PAGE (4-12%) and transferred to  
712 Nitrocellulose membrane Hybond ECL (GE HealthCare). Primary antibodies used  
713 were rabbit anti-CNTN5 (Novus, NBP1-83243) and rabbit anti-EHMT2/G9A  
714 (Abcam, ab185050). HRP-conjugated secondary antibodies (Invitrogen) were  
715 used and the membranes were developed with SuperSignal West Pico  
716 Chemiluminescent Substrate (Pierce). Images acquired using ChemiDoc MP  
717 (BioRad) and quantified using software Imagelab v4.1 (BioRad). Western Blots  
718 were repeated at least twice for each biological replicate.



## 719 **Mycoplasma Testing**

720 All cell lines were regularly tested for presence of mycoplasma using a standard  
721 method (Otto, 1996).

722

723

## 724 **Acknowledgements**

725 We thank the Autism Speaks MSSNG project for genomic data and linking to  
726 consented families. We also thank Melissa Carter, Wendy Roberts, Brian Chung  
727 and Rosanna Weksberg for obtaining skin biopsies and blood work, and the  
728 families for volunteering. We also thank Tara Paton, Guillermo Casallo, Barbara  
729 Kellam, Ny Hoang and Sylvia Lamoureux for technical help; T.C. Südhof for the  
730 NEUROG2/rtTA lentiviral constructs.

## 731 **Funding**

732 This work was supported by The Centre for Applied Genomics, Genome Canada/  
733 Ontario Genomics, the Canadian Institutes of Health Research (CIHR), the  
734 Canadian Institute for Advanced Research (CIFAR), the University of Toronto  
735 McLaughlin Centre, the Canada Foundation for Innovation (CFI), the Ontario  
736 Research Fund (ORF), Autism Speaks, and the Hospital for Sick Children  
737 Foundation. Scholarships and funding was from CFI-John R. Evans Leaders  
738 Fund(JELF)/ORF and CIHR to J.E.; CIHR, Ontario Brain Institute (OBI), Natural  
739 Sciences and Engineering Research Council (NSERC) and the Scottish Rite

740 Charitable Foundation to K.K.S.; National Institutes of Health (NIH) to J.E. and  
741 S.W.S.; Province of Ontario Neurodevelopmental Disorders (POND) from OBI to  
742 J.E., S.W.S. and K.K.S.; E.D. was a recipient of the Banting Post-Doctoral  
743 Fellowship and the Fonds de Recherche en Santé du Québec (FRQS) Post-  
744 Doctoral Fellowship; S.H.W. was supported by a Fellowship from the Fragile X  
745 Research Foundation of Canada; D.C.R received the International Rett  
746 Syndrome Foundation Fellowship; R.K.C.Y. received the Autism Speaks Meixner  
747 Postdoctoral Fellowship in Translational Research and a NARSAD Young  
748 Investigator award. S.W.S. holds the GlaxoSmithKline-CIHR chair in Genome  
749 Sciences at the University of Toronto and the Hospital for Sick Children.

750

751

## 752 **Competing Interests**

753 The authors declare no competing interests.

754

755

## 756 **References**

757 BELTRAO-BRAGA, P. C. & MUOTRI, A. R. 2017. Modeling autism spectrum disorders  
758 with human neurons. *Brain Res*, 1656, 49-54.

- 759 BETANCUR, C. 2011. Etiological heterogeneity in autism spectrum disorders: more  
760 than 100 genetic and genomic disorders and still counting. *Brain Res*, 1380,  
761 42-77.
- 762 BISHOP, S. L., FARMER, C., BAL, V., ROBINSON, E. B., WILLSEY, A. J., WERLING, D. M.,  
763 HAVDAHL, K. A., SANDERS, S. J. & THURM, A. 2017. Identification of  
764 Developmental and Behavioral Markers Associated With Genetic  
765 Abnormalities in Autism Spectrum Disorder. *Am J Psychiatry*, 174, 576-585.
- 766 BOURGERON, T. 2015. From the genetic architecture to synaptic plasticity in autism  
767 spectrum disorder. *Nat Rev Neurosci*, 16, 551-63.
- 768 BRANDLER, W. M., ANTAKI, D., GUJRAL, M., KLEIBER, M. L., WHITNEY, J., MAILE, M.  
769 S., HONG, O., CHAPMAN, T. R., TAN, S., TANDON, P., PANG, T., TANG, S. C.,  
770 VAUX, K. K., YANG, Y., HARRINGTON, E., JUUL, S., TURNER, D. J.,  
771 THIRUVAHINDRAPURAM, B., KAUR, G., WANG, Z., KINGSMORE, S. F.,  
772 GLEESON, J. G., BISSON, D., KAKARADOV, B., TELENTI, A., VENTER, J. C.,  
773 COROMINAS, R., TOMA, C., CORMAND, B., RUEDA, I., GUIJARRO, S., MESSER, K.  
774 S., NIEVERGELT, C. M., ARRANZ, M. J., COURCHESNE, E., PIERCE, K., MUOTRI,  
775 A. R., IAKOUCHEVA, L. M., HERVAS, A., SCHERER, S. W., CORSELLO, C. &  
776 SEBAT, J. 2018. Paternally inherited cis-regulatory structural variants are  
777 associated with autism. *Science*, 360, 327-331.
- 778 CANITANO, R. & PALLAGROSI, M. 2017. Autism Spectrum Disorders and  
779 Schizophrenia Spectrum Disorders: Excitation/Inhibition Imbalance and  
780 Developmental Trajectories. *Front Psychiatry*, 8, 69.
- 781 CARTER, M. T. & SCHERER, S. W. 2013. Autism spectrum disorder in the genetics  
782 clinic: a review. *Clin Genet*, 83, 399-407.
- 783 CHENG, C., FASS, D. M., FOLZ-DONAHUE, K., MACDONALD, M. E. & HAGGARTY, S. J.  
784 2017. Highly Expandable Human iPS Cell-Derived Neural Progenitor Cells  
785 (NPC) and Neurons for Central Nervous System Disease Modeling and High-  
786 Throughput Screening. *Curr Protoc Hum Genet*, 92, 21 8 1-21 8 21.
- 787 CLEMENTE, D., ESTEBAN, P. F., DEL VALLE, I., BRIBIAN, A., SOUSSI-YANICOSTAS, N.,  
788 SILVA, A. & DE CASTRO, F. 2008. Expression pattern of Anosmin-1 during  
789 pre- and postnatal rat brain development. *Dev Dyn*, 237, 2518-28.
- 790 DE RUBEIS, S., HE, X., GOLDBERG, A. P., POULTNEY, C. S., SAMOCHA, K., CICEK, A. E.,  
791 KOU, Y., LIU, L., FROMER, M., WALKER, S., SINGH, T., KLEI, L., KOSMICKI, J.,  
792 SHIH-CHEN, F., ALEKSIC, B., BISCALDI, M., BOLTON, P. F., BROWNFELD, J. M.,  
793 CAI, J., CAMPBELL, N. G., CARRACEDO, A., CHAHROUR, M. H., CHIOCCHETTI,  
794 A. G., COON, H., CRAWFORD, E. L., CURRAN, S. R., DAWSON, G., DUKETIS, E.,  
795 FERNANDEZ, B. A., GALLAGHER, L., GELLER, E., GUTER, S. J., HILL, R. S.,  
796 IONITA-LAZA, J., JIMENZ GONZALEZ, P., KILPINEN, H., KLAUCK, S. M.,  
797 KOLEVZON, A., LEE, I., LEI, I., LEI, J., LEHTIMAKI, T., LIN, C. F., MA'AYAN, A.,  
798 MARSHALL, C. R., MCINNES, A. L., NEALE, B., OWEN, M. J., OZAKI, N.,  
799 PARELLADA, M., PARR, J. R., PURCELL, S., PUURA, K., RAJAGOPALAN, D.,  
800 REHNSTROM, K., REICHENBERG, A., SABO, A., SACHSE, M., SANDERS, S. J.,  
801 SCHAFER, C., SCHULTE-RUTHER, M., SKUSE, D., STEVENS, C., SZATMARI, P.,  
802 TAMMIMIES, K., VALLADARES, O., VORAN, A., LI-SAN, W., WEISS, L. A.,  
803 WILLSEY, A. J., YU, T. W., YUEN, R. K., STUDY, D. D. D., HOMOZYGOSITY  
804 MAPPING COLLABORATIVE FOR, A., CONSORTIUM, U. K., COOK, E. H.,

805 FREITAG, C. M., GILL, M., HULTMAN, C. M., LEHNER, T., PALOTIE, A.,  
806 SCHELLENBERG, G. D., SKLAR, P., STATE, M. W., SUTCLIFFE, J. S., WALSH, C.  
807 A., SCHERER, S. W., ZWICK, M. E., BARETT, J. C., CUTLER, D. J., ROEDER, K.,  
808 DEVLIN, B., DALY, M. J. & BUXBAUM, J. D. 2014. Synaptic, transcriptional and  
809 chromatin genes disrupted in autism. *Nature*, 515, 209-15.  
810 DEIMLING, S. J., OLSEN, J. B. & TROPEPE, V. 2017. The expanding role of the  
811 Ehmt2/G9a complex in neurodevelopment. *Neurogenesis (Austin)*, 4,  
812 e1316888.  
813 DENEALT, E., WHITE, S. H., RODRIGUES, D., ROSS, P. J., FAHEEM, M., ZASLAVSKY,  
814 K., WANG, Z., ALEXANDROVA, R., PELLECCIA, G., WEI, W., PIEKNA, A., KAUR,  
815 G., HOWE, J. L., KWAN, V., THIRUVAHINDRAPURAM, B., WALKER, S., PASCERI,  
816 P., MERICO, D., YUEN, R. C. K., SINGH, K. K., ELLIS, J. & SCHERER, S. W. 2018.  
817 Complete Disruption of Autism-Susceptibility Genes by Gene-Editing  
818 Predominantly Reduces Functional Connectivity of Isogenic Human Neurons.  
819 *bioRxiv preprint server, DOI:10.1101/344234*.  
820 DEVLIN, B. & SCHERER, S. W. 2012. Genetic architecture in autism spectrum  
821 disorder. *Curr Opin Genet Dev*, 22, 229-37.  
822 DODE, C. & HARDELIN, J. P. 2009. Kallmann syndrome. *Eur J Hum Genet*, 17, 139-46.  
823 DOLMETSCH, R. & GESCHWIND, D. H. 2011. The human brain in a dish: the promise  
824 of iPSC-derived neurons. *Cell*, 145, 831-4.  
825 DSM-V 2013. Diagnostic and Statistical Manual of Mental Disorders, Fifth Edition.  
826 *American Psychiatric Association*.  
827 DURAK, O. & TSAI, L. H. 2014. Human induced pluripotent stem cells: now open to  
828 discovery. *Cell Stem Cell*, 15, 4-6.  
829 FERNANDEZ, B. A. & SCHERER, S. W. 2017. Syndromic autism spectrum disorders:  
830 moving from a clinically defined to a molecularly defined approach. *Dialogues*  
831 *Clin Neurosci*, 19, 353-371.  
832 GESCHWIND, D. H. & STATE, M. W. 2015. Gene hunting in autism spectrum disorder:  
833 on the path to precision medicine. *Lancet Neurol*, 14, 1109-20.  
834 GILMAN, S. R., IOSSIFOV, I., LEVY, D., RONEMUS, M., WIGLER, M. & VITKUP, D. 2011.  
835 Rare de novo variants associated with autism implicate a large functional  
836 network of genes involved in formation and function of synapses. *Neuron*, 70,  
837 898-907.  
838 HABELA, C. W., SONG, H. & MING, G. L. 2016. Modeling synaptogenesis in  
839 schizophrenia and autism using human iPSC derived neurons. *Mol Cell*  
840 *Neurosci*, 73, 52-62.  
841 HO, S. M., HARTLEY, B. J., TCW, J., BEAUMONT, M., STAFFORD, K., SLESINGER, P. A. &  
842 BRENNAND, K. J. 2016. Rapid Ngn2-induction of excitatory neurons from  
843 hiPSC-derived neural progenitor cells. *Methods*, 101, 113-24.  
844 HOFFMAN, G. E., SCHRODE, N., FLAHERTY, E. & BRENNAND, K. J. 2018. New  
845 considerations for hiPSC-based models of neuropsychiatric disorders. *Mol*  
846 *Psychiatry*.  
847 HOTTA, A., CHEUNG, A. Y., FARRA, N., VIJAYARAGAVAN, K., SEGUIN, C. A., DRAPER, J.  
848 S., PASCERI, P., MAKSAKOVA, I. A., MAGER, D. L., ROSSANT, J., BHATIA, M. &  
849 ELLIS, J. 2009. Isolation of human iPSCs using EOS lentiviral vectors to  
850 select for pluripotency. *Nat Methods*, 6, 370-6.

- 851 JIANG, Y. H., YUEN, R. K., JIN, X., WANG, M., CHEN, N., WU, X., JU, J., MEI, J., SHI, Y., HE,  
852 M., WANG, G., LIANG, J., WANG, Z., CAO, D., CARTER, M. T., CHRYSLER, C.,  
853 DRMIC, I. E., HOWE, J. L., LAU, L., MARSHALL, C. R., MERICO, D.,  
854 NALPATHAMKALAM, T., THIRUVAHINDRAPURAM, B., THOMPSON, A.,  
855 UDDIN, M., WALKER, S., LUO, J., ANAGNOSTOU, E., ZWAIGENBAUM, L., RING,  
856 R. H., WANG, J., LAJONCHERE, C., WANG, J., SHIH, A., SZATMARI, P., YANG, H.,  
857 DAWSON, G., LI, Y. & SCHERER, S. W. 2013. Detection of clinically relevant  
858 genetic variants in autism spectrum disorder by whole-genome sequencing.  
859 *Am J Hum Genet*, 93, 249-63.
- 860 JIANG-XIE, L. F., LIAO, H. M., CHEN, C. H., CHEN, Y. T., HO, S. Y., LU, D. H., LEE, L. J.,  
861 LIOU, H. H., FU, W. M. & GAU, S. S. 2014. Autism-associated gene *Dlgap2*  
862 mutant mice demonstrate exacerbated aggressive behaviors and  
863 orbitofrontal cortex deficits. *Mol Autism*, 5, 32.
- 864 JINEK, M., CHYLINSKI, K., FONFARA, I., HAUER, M., DOUDNA, J. A. & CHARPENTIER,  
865 E. 2012. A programmable dual-RNA-guided DNA endonuclease in adaptive  
866 bacterial immunity. *Science*, 337, 816-21.
- 867 JONES, R. M. & LORD, C. 2013. Diagnosing autism in neurobiological research  
868 studies. *Behav Brain Res*, 251, 113-24.
- 869 KARMACHARYA, R. & HAGGARTY, S. J. 2016. Stem cell models of neuropsychiatric  
870 disorders. *Mol Cell Neurosci*, 73, 1-2.
- 871 KIM, H. J. & MAGRANE, J. 2011. Isolation and culture of neurons and astrocytes from  
872 the mouse brain cortex. *Methods Mol Biol*, 793, 63-75.
- 873 KLEEFSTRA, T., SMIDT, M., BANNING, M. J., OUDAKKER, A. R., VAN ESCH, H., DE  
874 BROUWER, A. P., NILLESEN, W., SISTERMANS, E. A., HAMEL, B. C., DE BRUIJN,  
875 D., FRYNS, J. P., YNTEMA, H. G., BRUNNER, H. G., DE VRIES, B. B. & VAN  
876 BOKHOVEN, H. 2005. Disruption of the gene Euchromatin Histone Methyl  
877 Transferase1 (Eu-HMTase1) is associated with the 9q34 subtelomeric  
878 deletion syndrome. *J Med Genet*, 42, 299-306.
- 879 KLEIJER, K. T. E., VAN NIEUWENHUIZE, D., SPIERENBURG, H. A., GREGORIO-  
880 JORDAN, S., KAS, M. J. H. & BURBACH, J. P. H. 2018. Structural abnormalities  
881 in the primary somatosensory cortex and a normal behavioral profile in  
882 Contactin-5 deficient mice. *Cell Adh Migr*, 12, 5-18.
- 883 LIN, Y. T., SEO, J., GAO, F., FELDMAN, H. M., WEN, H. L., PENNEY, J., CAM, H. P.,  
884 GJONESKA, E., RAJA, W. K., CHENG, J., RUEDA, R., KRITSKIY, O., ABDURROB, F.,  
885 PENG, Z., MILO, B., YU, C. J., ELMSAOURI, S., DEY, D., KO, T., YANKNER, B. A. &  
886 TSAI, L. H. 2018. APOE4 Causes Widespread Molecular and Cellular  
887 Alterations Associated with Alzheimer's Disease Phenotypes in Human iPSC-  
888 Derived Brain Cell Types. *Neuron*, 98, 1294.
- 889 LIONEL, A. C., CROSBIE, J., BARBOSA, N., GOODALE, T., THIRUVAHINDRAPURAM, B.,  
890 RICKABY, J., GAZZELLONE, M., CARSON, A. R., HOWE, J. L., WANG, Z., WEI, J.,  
891 STEWART, A. F., ROBERTS, R., MCPHERSON, R., FIEBIG, A., FRANKE, A.,  
892 SCHREIBER, S., ZWAIGENBAUM, L., FERNANDEZ, B. A., ROBERTS, W.,  
893 ARNOLD, P. D., SZATMARI, P., MARSHALL, C. R., SCHACHAR, R. & SCHERER, S.  
894 W. 2011. Rare copy number variation discovery and cross-disorder  
895 comparisons identify risk genes for ADHD. *Sci Transl Med*, 3, 95ra75.

- 896 MAHDI, S., ALBERTOWSKI, K., ALMODAYFER, O., ARSENOPOULOU, V., CARUCCI, S.,  
897 DIAS, J. C., KHALIL, M., KNUPPEL, A., LANGMANN, A., LAURITSEN, M. B., DA  
898 CUNHA, G. R., UCHIYAMA, T., WOLFF, N., SELB, M., GRANLUND, M., DE VRIES,  
899 P. J., ZWAIGENBAUM, L. & BOLTE, S. 2018. An International Clinical Study of  
900 Ability and Disability in Autism Spectrum Disorder Using the WHO-ICF  
901 Framework. *J Autism Dev Disord*, 48, 2148-2163.
- 902 MALHOTRA, D. & SEBAT, J. 2012. CNVs: harbingers of a rare variant revolution in  
903 psychiatric genetics. *Cell*, 148, 1223-41.
- 904 MANARA, R., SALVALAGGIO, A., FAVARO, A., PALUMBO, V., CITTON, V., ELEFANTE,  
905 A., BRUNETTI, A., DI SALLE, F., BONANNI, G., SINISI, A. A. & KALLMANN  
906 SYNDROME NEURORADIOLOGICAL STUDY, G. 2014. Brain changes in  
907 Kallmann syndrome. *AJNR Am J Neuroradiol*, 35, 1700-6.
- 908 MARCHETTO, M. C., BELINSON, H., TIAN, Y., FREITAS, B. C., FU, C., VADODARIA, K.,  
909 BELTRAO-BRAGA, P., TRUJILLO, C. A., MENDES, A. P. D., PADMANABHAN, K.,  
910 NUNEZ, Y., OU, J., GHOSH, H., WRIGHT, R., BRENNAND, K., PIERCE, K.,  
911 EICHENFIELD, L., PRAMPARO, T., EYLER, L., BARNES, C. C., COURCHESNE, E.,  
912 GESCHWIND, D. H., GAGE, F. H., WYNshaw-BORIS, A. & MUOTRI, A. R. 2017.  
913 Altered proliferation and networks in neural cells derived from idiopathic  
914 autistic individuals. *Mol Psychiatry*, 22, 820-835.
- 915 MARSHALL, C. R., NOOR, A., VINCENT, J. B., LIONEL, A. C., FEUK, L., SKAUG, J., SHAGO,  
916 M., MOESSNER, R., PINTO, D., REN, Y., THIRUVAHINDRAPDURAM, B., FIEBIG,  
917 A., SCHREIBER, S., FRIEDMAN, J., KETELAARS, C. E., VOS, Y. J., FICICIOGLU, C.,  
918 KIRKPATRICK, S., NICOLSON, R., SLOMAN, L., SUMMERS, A., GIBBONS, C. A.,  
919 TEEBI, A., CHITAYAT, D., WEKSBERG, R., THOMPSON, A., VARDY, C., CROSBIE,  
920 V., LUSCOMBE, S., BAATJES, R., ZWAIGENBAUM, L., ROBERTS, W.,  
921 FERNANDEZ, B., SZATMARI, P. & SCHERER, S. W. 2008. Structural variation  
922 of chromosomes in autism spectrum disorder. *Am J Hum Genet*, 82, 477-88.
- 923 MERCATI, O., HUGUET, G., DANCKAERT, A., ANDRE-LEROUX, G., MARUANI, A.,  
924 BELLINZONI, M., ROLLAND, T., GOUDER, L., MATHIEU, A., BURATTI, J.,  
925 AMSELLEM, F., BENABOU, M., VAN-GILS, J., BEGGIATO, A., KONYUKH, M.,  
926 BOURGEOIS, J. P., GAZZELLONE, M. J., YUEN, R. K., WALKER, S., DELEPINE, M.,  
927 BOLAND, A., REGNAULT, B., FRANCOIS, M., VAN DEN ABBEELE, T., MOSCA-  
928 BOIDRON, A. L., FAIVRE, L., SHIMODA, Y., WATANABE, K., BONNEAU, D.,  
929 RASTAM, M., LEBOYER, M., SCHERER, S. W., GILLBERG, C., DELORME, R.,  
930 CLOEZ-TAYARANI, I. & BOURGERON, T. 2017. CNTN6 mutations are risk  
931 factors for abnormal auditory sensory perception in autism spectrum  
932 disorders. *Mol Psychiatry*, 22, 625-633.
- 933 MIYAOKA, Y., CHAN, A. H., JUDGE, L. M., YOO, J., HUANG, M., NGUYEN, T. D.,  
934 LIZARRAGA, P. P., SO, P. L. & CONKLIN, B. R. 2014. Isolation of single-base  
935 genome-edited human iPS cells without antibiotic selection. *Nat Methods*, 11,  
936 291-3.
- 937 OHASHI, R., TAKAO, K., MIYAKAWA, T. & SHIINA, N. 2016. Comprehensive  
938 behavioral analysis of RNG105 (Caprin1) heterozygous mice: Reduced social  
939 interaction and attenuated response to novelty. *Sci Rep*, 6, 20775.

- 940 OTTO, E. Z., C; KALOSS, M; DEL GIUDICE, RA; GARDELLA, R; MCGARRITY, GK. 1996.  
941 Quantitative detection of cell culture Mycoplasmas by a one step polymerase  
942 chain reaction method. *Methods in Cell Science*, 18, 261-268.
- 943 PAK, C., DANKO, T., ZHANG, Y., AOTO, J., ANDERSON, G., MAXEINER, S., YI, F.,  
944 WERNIG, M. & SUDHOF, T. C. 2015. Human Neuropsychiatric Disease  
945 Modeling using Conditional Deletion Reveals Synaptic Transmission Defects  
946 Caused by Heterozygous Mutations in NRXN1. *Cell Stem Cell*, 17, 316-28.
- 947 PINTO, D., DELABY, E., MERICO, D., BARBOSA, M., MERIKANGAS, A., KLEI, L.,  
948 THIRUVAHINDRAPURAM, B., XU, X., ZIMAN, R., WANG, Z., VORSTMAN, J. A.,  
949 THOMPSON, A., REGAN, R., PILORGE, M., PELLECCIA, G., PAGNAMENTA, A.  
950 T., OLIVEIRA, B., MARSHALL, C. R., MAGALHAES, T. R., LOWE, J. K., HOWE, J.  
951 L., GRISWOLD, A. J., GILBERT, J., DUKETIS, E., DOMBROSKI, B. A., DE JONGE,  
952 M. V., CUCCARO, M., CRAWFORD, E. L., CORREIA, C. T., CONROY, J.,  
953 CONCEICAO, I. C., CHIOCCHETTI, A. G., CASEY, J. P., CAI, G., CABROL, C.,  
954 BOLSHAKOVA, N., BACCHELLI, E., ANNEY, R., GALLINGER, S., COTTERCHIO,  
955 M., CASEY, G., ZWAIGENBAUM, L., WITTEMEYER, K., WING, K., WALLACE, S.,  
956 VAN ENGELAND, H., TRYFON, A., THOMSON, S., SOORYA, L., ROGE, B.,  
957 ROBERTS, W., POUSTKA, F., MOUGA, S., MINSHEW, N., MCINNES, L. A.,  
958 MCGREW, S. G., LORD, C., LEBOYER, M., LE COUTEUR, A. S., KOLEVZON, A.,  
959 JIMENEZ GONZALEZ, P., JACOB, S., HOLT, R., GUTER, S., GREEN, J., GREEN, A.,  
960 GILLBERG, C., FERNANDEZ, B. A., DUQUE, F., DELORME, R., DAWSON, G.,  
961 CHASTE, P., CAFE, C., BRENNAN, S., BOURGERON, T., BOLTON, P. F., BOLTE,  
962 S., BERNIER, R., BAIRD, G., BAILEY, A. J., ANAGNOSTOU, E., ALMEIDA, J.,  
963 WIJSMAN, E. M., VIELAND, V. J., VICENTE, A. M., SCHELLENBERG, G. D.,  
964 PERICAK-VANCE, M., PATERSON, A. D., PARR, J. R., OLIVEIRA, G.,  
965 NURNBERGER, J. I., MONACO, A. P., MAESTRINI, E., KLAUCK, S. M.,  
966 HAKONARSON, H., HAINES, J. L., GESCHWIND, D. H., FREITAG, C. M.,  
967 FOLSTEIN, S. E., ENNIS, S., et al. 2014. Convergence of genes and cellular  
968 pathways dysregulated in autism spectrum disorders. *Am J Hum Genet*, 94,  
969 677-94.
- 970 POWELL, S. K., GREGORY, J., AKBARIAN, S. & BRENNAND, K. J. 2017. Application of  
971 CRISPR/Cas9 to the study of brain development and neuropsychiatric  
972 disease. *Mol Cell Neurosci*, 82, 157-166.
- 973 RAN, F. A., HSU, P. D., LIN, C. Y., GOOTENBERG, J. S., KONERMANN, S., TREVINO, A. E.,  
974 SCOTT, D. A., INOUE, A., MATOBA, S., ZHANG, Y. & ZHANG, F. 2013. Double  
975 nicking by RNA-guided CRISPR Cas9 for enhanced genome editing specificity.  
976 *Cell*, 154, 1380-9.
- 977 RICE, J. C., BRIGGS, S. D., UEBERHEIDE, B., BARBER, C. M., SHABANOWITZ, J., HUNT,  
978 D. F., SHINKAI, Y. & ALLIS, C. D. 2003. Histone methyltransferases direct  
979 different degrees of methylation to define distinct chromatin domains. *Mol*  
980 *Cell*, 12, 1591-8.
- 981 RONALD, A. & HOEKSTRA, R. A. 2011. Autism spectrum disorders and autistic traits:  
982 a decade of new twin studies. *Am J Med Genet B Neuropsychiatr Genet*, 156B,  
983 255-74.

- 984 ROYBON, L., MASTRACCI, T. L., RIBEIRO, D., SUSSEL, L., BRUNDIN, P. & LI, J. Y. 2010.  
985 GABAergic differentiation induced by Mash1 is compromised by the bHLH  
986 proteins Neurogenin2, NeuroD1, and NeuroD2. *Cereb Cortex*, 20, 1234-44.
- 987 SAHIN, M. & SUR, M. 2015. Genes, circuits, and precision therapies for autism and  
988 related neurodevelopmental disorders. *Science*, 350.
- 989 SANDERS, S. J., HE, X., WILLSEY, A. J., ERCAN-SENCICEK, A. G., SAMOCHA, K. E.,  
990 CICEK, A. E., MURTHA, M. T., BAL, V. H., BISHOP, S. L., DONG, S., GOLDBERG, A.  
991 P., JINLU, C., KEANEY, J. F., 3RD, KLEI, L., MANDELL, J. D., MORENO-DE-LUCA,  
992 D., POULTNEY, C. S., ROBINSON, E. B., SMITH, L., SOLLI-NOWLAN, T., SU, M. Y.,  
993 TERAN, N. A., WALKER, M. F., WERLING, D. M., BEAUDET, A. L., CANTOR, R.  
994 M., FOMBONNE, E., GESCHWIND, D. H., GRICE, D. E., LORD, C., LOWE, J. K.,  
995 MANE, S. M., MARTIN, D. M., MORROW, E. M., TALKOWSKI, M. E., SUTCLIFFE,  
996 J. S., WALSH, C. A., YU, T. W., AUTISM SEQUENCING, C., LEDBETTER, D. H.,  
997 MARTIN, C. L., COOK, E. H., BUXBAUM, J. D., DALY, M. J., DEVLIN, B., ROEDER,  
998 K. & STATE, M. W. 2015. Insights into Autism Spectrum Disorder Genomic  
999 Architecture and Biology from 71 Risk Loci. *Neuron*, 87, 1215-1233.
- 1000 SHIINA, N. & NAKAYAMA, K. 2014. RNA granule assembly and disassembly  
1001 modulated by nuclear factor associated with double-stranded RNA 2 and  
1002 nuclear factor 45. *J Biol Chem*, 289, 21163-80.
- 1003 SHIINA, N., YAMAGUCHI, K. & TOKUNAGA, M. 2010. RNG105 deficiency impairs the  
1004 dendritic localization of mRNAs for Na<sup>+</sup>/K<sup>+</sup> ATPase subunit isoforms and  
1005 leads to the degeneration of neuronal networks. *J Neurosci*, 30, 12816-30.
- 1006 SUN, S., YANG, F., TAN, G., COSTANZO, M., OUGHTRED, R., HIRSCHMAN, J.,  
1007 THEESFELD, C. L., BANSAL, P., SAHNI, N., YI, S., YU, A., TYAGI, T., TIE, C., HILL,  
1008 D. E., VIDAL, M., ANDREWS, B. J., BOONE, C., DOLINSKI, K. & ROTH, F. P. 2016.  
1009 An extended set of yeast-based functional assays accurately identifies human  
1010 disease mutations. *Genome Res*, 26, 670-80.
- 1011 TAKAHASHI, K., TANABE, K., OHNUKI, M., NARITA, M., ICHISAKA, T., TOMODA, K. &  
1012 YAMANAKA, S. 2007. Induction of pluripotent stem cells from adult human  
1013 fibroblasts by defined factors. *Cell*, 131, 861-72.
- 1014 TAMMIMIES, K., MARSHALL, C. R., WALKER, S., KAUR, G., THIRUVAHINDRAPURAM,  
1015 B., LIONEL, A. C., YUEN, R. K., UDDIN, M., ROBERTS, W., WEKSBERG, R.,  
1016 WOODBURY-SMITH, M., ZWAIGENBAUM, L., ANAGNOSTOU, E., WANG, Z.,  
1017 WEI, J., HOWE, J. L., GAZZELLONE, M. J., LAU, L., SUNG, W. W., WHITTEN, K.,  
1018 VARDY, C., CROSBIE, V., TSANG, B., D'ABATE, L., TONG, W. W., LUSCOMBE, S.,  
1019 DOYLE, T., CARTER, M. T., SZATMARI, P., STUCKLESS, S., MERICO, D.,  
1020 STAVROPOULOS, D. J., SCHERER, S. W. & FERNANDEZ, B. A. 2015. Molecular  
1021 Diagnostic Yield of Chromosomal Microarray Analysis and Whole-Exome  
1022 Sequencing in Children With Autism Spectrum Disorder. *JAMA*, 314, 895-903.
- 1023 TOYOSHIMA, M., SAKURAI, K., SHIMAZAKI, K., TAKEDA, Y., SHIMODA, Y. &  
1024 WATANABE, K. 2009. Deficiency of neural recognition molecule NB-2 affects  
1025 the development of glutamatergic auditory pathways from the ventral  
1026 cochlear nucleus to the superior olivary complex in mouse. *Dev Biol*, 336,  
1027 192-200.



- 1028 TUKKER, A. M., WIJNOLTS, F. M. J., DE GROOT, A. & WESTERINK, R. H. S. 2018.  
1029 Human iPSC-derived neuronal models for in vitro neurotoxicity assessment.  
1030 *Neurotoxicology*, 67, 215-225.
- 1031 UDDIN, M., TAMMIMIES, K., PELLECCIA, G., ALIPANAHI, B., HU, P., WANG, Z.,  
1032 PINTO, D., LAU, L., NALPATHAMKALAM, T., MARSHALL, C. R., BLENCOWE, B.  
1033 J., FREY, B. J., MERICO, D., YUEN, R. K. & SCHERER, S. W. 2014. Brain-  
1034 expressed exons under purifying selection are enriched for de novo  
1035 mutations in autism spectrum disorder. *Nat Genet*, 46, 742-7.
- 1036 VAN DAALEN, E., KEMNER, C., VERBEEK, N. E., VAN DER ZWAAG, B., DIJKHUIZEN, T.,  
1037 RUMP, P., HOUBEN, R., VAN 'T SLOT, R., DE JONGE, M. V., STAAL, W. G.,  
1038 BEEMER, F. A., VORSTMAN, J. A., BURBACH, J. P., VAN AMSTEL, H. K.,  
1039 HOCHSTENBACH, R., BRILSTRA, E. H. & POOT, M. 2011. Social  
1040 Responsiveness Scale-aided analysis of the clinical impact of copy number  
1041 variations in autism. *Neurogenetics*, 12, 315-23.
- 1042 WEINER, D. J., WIGDOR, E. M., RIPKE, S., WALTERS, R. K., KOSMICKI, J. A., GROVE, J.,  
1043 SAMOCHA, K. E., GOLDSTEIN, J. I., OKBAY, A., BYBJERG-GRAUHOLM, J.,  
1044 WERGE, T., HOUGAARD, D. M., TAYLOR, J., I, P.-B. A. G., PSYCHIATRIC  
1045 GENOMICS CONSORTIUM AUTISM, G., SKUSE, D., DEVLIN, B., ANNEY, R.,  
1046 SANDERS, S. J., BISHOP, S., MORTENSEN, P. B., BORGLUM, A. D., SMITH, G. D.,  
1047 DALY, M. J. & ROBINSON, E. B. 2017. Polygenic transmission disequilibrium  
1048 confirms that common and rare variation act additively to create risk for  
1049 autism spectrum disorders. *Nat Genet*, 49, 978-985.
- 1050 WINDEN, K. D., EBRAHIMI-FAKHARI, D. & SAHIN, M. 2018. Abnormal mTOR  
1051 Activation in Autism. *Annu Rev Neurosci*, 41, 1-23.
- 1052 WOODBURY-SMITH, M., DENEAULT, E., YUEN, R. K. C., WALKER, S., ZARREI, M.,  
1053 PELLECCIA, G., HOWE, J. L., HOANG, N., UDDIN, M., MARSHALL, C. R.,  
1054 CHRYSLER, C., THOMPSON, A., SZATMARI, P. & SCHERER, S. W. 2017a.  
1055 Mutations in RAB39B in individuals with intellectual disability, autism  
1056 spectrum disorder, and macrocephaly. *Mol Autism*, 8, 59.
- 1057 WOODBURY-SMITH, M., NICOLSON, R., ZARREI, M., YUEN, R. K. C., WALKER, S.,  
1058 HOWE, J., UDDIN, M., HOANG, N., BUCHANAN, J. A., CHRYSLER, C.,  
1059 THOMPSON, A., SZATMARI, P. & SCHERER, S. W. 2017b. Variable phenotype  
1060 expression in a family segregating microdeletions of the NRXN1 and MBD5  
1061 autism spectrum disorder susceptibility genes. *NPJ Genom Med*, 2.
- 1062 YI, F., DANKO, T., BOTELHO, S. C., PATZKE, C., PAK, C., WERNIG, M. & SUDHOF, T. C.  
1063 2016. Autism-associated SHANK3 haploinsufficiency causes Ih  
1064 channelopathy in human neurons. *Science*, 352, aaf2669.
- 1065 YOON, K. J., NGUYEN, H. N., URSINI, G., ZHANG, F., KIM, N. S., WEN, Z., MAKRI, G.,  
1066 NAUEN, D., SHIN, J. H., PARK, Y., CHUNG, R., PEKLE, E., ZHANG, C., TOWE, M.,  
1067 HUSSAINI, S. M., LEE, Y., RUJESCU, D., ST CLAIR, D., KLEINMAN, J. E., HYDE, T.  
1068 M., KRAUSS, G., CHRISTIAN, K. M., RAPOPORT, J. L., WEINBERGER, D. R.,  
1069 SONG, H. & MING, G. L. 2014. Modeling a genetic risk for schizophrenia in  
1070 iPSCs and mice reveals neural stem cell deficits associated with adherens  
1071 junctions and polarity. *Cell Stem Cell*, 15, 79-91.
- 1072 YU, J., VODYANIK, M. A., SMUGA-OTTO, K., ANTOSIEWICZ-BOURGET, J., FRANE, J. L.,  
1073 TIAN, S., NIE, J., JONSDOTTIR, G. A., RUOTTI, V., STEWART, R., SLUKVIN, II &

- 1074 THOMSON, J. A. 2007. Induced pluripotent stem cell lines derived from  
1075 human somatic cells. *Science*, 318, 1917-20.
- 1076 YUEN, R. K., MERICO, D., BOOKMAN, M., J. L. H., THIRUVAHINDRAPURAM, B., PATEL,  
1077 R. V., WHITNEY, J., DEFLAUX, N., BINGHAM, J., WANG, Z., PELLECCIA, G.,  
1078 BUCHANAN, J. A., WALKER, S., MARSHALL, C. R., UDDIN, M., ZARREI, M.,  
1079 DENEULT, E., D'ABATE, L., CHAN, A. J., KOYANAGI, S., PATON, T., PEREIRA,  
1080 S. L., HOANG, N., ENGCHUAN, W., HIGGINBOTHAM, E. J., HO, K., LAMOUREUX,  
1081 S., LI, W., MACDONALD, J. R., NALPATHAMKALAM, T., SUNG, W. W., TSOI, F. J.,  
1082 WEI, J., XU, L., TASSE, A. M., KIRBY, E., VAN ETTEN, W., TWIGGER, S.,  
1083 ROBERTS, W., DRMIC, I., JILDERDA, S., MODI, B. M., KELLAM, B., SZEGO, M.,  
1084 CYTRYNBAUM, C., WEKSBERG, R., ZWAIGENBAUM, L., WOODBURY-SMITH,  
1085 M., BRIAN, J., SENMAN, L., IABONI, A., DOYLE-THOMAS, K., THOMPSON, A.,  
1086 CHRYSLER, C., LEEF, J., SAVION-LEMIEUX, T., SMITH, I. M., LIU, X., NICOLSON,  
1087 R., SEIFER, V., FEDELE, A., COOK, E. H., DAGER, S., ESTES, A., GALLAGHER, L.,  
1088 MALOW, B. A., PARR, J. R., SPENCE, S. J., VORSTMAN, J., FREY, B. J., ROBINSON,  
1089 J. T., STRUG, L. J., FERNANDEZ, B. A., ELSABBAGH, M., CARTER, M. T.,  
1090 HALLMAYER, J., KNOPPERS, B. M., ANAGNOSTOU, E., SZATMARI, P., RING, R.  
1091 H., GLAZER, D., PLETCHER, M. T. & SCHERER, S. W. 2017. Whole genome  
1092 sequencing resource identifies 18 new candidate genes for autism spectrum  
1093 disorder. *Nat Neurosci*, 20, 602-611.
- 1094 YUEN, R. K., MERICO, D., CAO, H., PELLECCIA, G., ALIPANAHI, B.,  
1095 THIRUVAHINDRAPURAM, B., TONG, X., SUN, Y., CAO, D., ZHANG, T., WU, X.,  
1096 JIN, X., ZHOU, Z., LIU, X., NALPATHAMKALAM, T., WALKER, S., HOWE, J. L.,  
1097 WANG, Z., MACDONALD, J. R., CHAN, A., D'ABATE, L., DENEULT, E., SIU, M.  
1098 T., TAMMIMIES, K., UDDIN, M., ZARREI, M., WANG, M., LI, Y., WANG, J., WANG,  
1099 J., YANG, H., BOOKMAN, M., BINGHAM, J., GROSS, S. S., LOY, D., PLETCHER, M.,  
1100 MARSHALL, C. R., ANAGNOSTOU, E., ZWAIGENBAUM, L., WEKSBERG, R.,  
1101 FERNANDEZ, B. A., ROBERTS, W., SZATMARI, P., GLAZER, D., FREY, B. J., RING,  
1102 R. H., XU, X. & SCHERER, S. W. 2016. Genome-wide characteristics of de novo  
1103 mutations in autism. *NPJ Genom Med*, 1, 160271-1602710.
- 1104 YUEN, R. K., THIRUVAHINDRAPURAM, B., MERICO, D., WALKER, S., TAMMIMIES, K.,  
1105 HOANG, N., CHRYSLER, C., NALPATHAMKALAM, T., PELLECCIA, G., LIU, Y.,  
1106 GAZZELLONE, M. J., D'ABATE, L., DENEULT, E., HOWE, J. L., LIU, R. S.,  
1107 THOMPSON, A., ZARREI, M., UDDIN, M., MARSHALL, C. R., RING, R. H.,  
1108 ZWAIGENBAUM, L., RAY, P. N., WEKSBERG, R., CARTER, M. T., FERNANDEZ,  
1109 B. A., ROBERTS, W., SZATMARI, P. & SCHERER, S. W. 2015. Whole-genome  
1110 sequencing of quartet families with autism spectrum disorder. *Nat Med*, 21,  
1111 185-91.
- 1112 ZHANG, J., KINCH, L. N., CONG, Q., WEILE, J., SUN, S., COTE, A. G., ROTH, F. P. &  
1113 GRISHIN, N. V. 2017. Assessing predictions of fitness effects of missense  
1114 mutations in SUMO-conjugating enzyme UBE2I. *Hum Mutat*, 38, 1051-1063.
- 1115 ZHANG, X., TAMARU, H., KHAN, S. I., HORTON, J. R., KEEFE, L. J., SELKER, E. U. &  
1116 CHENG, X. 2002. Structure of the Neurospora SET domain protein DIM-5, a  
1117 histone H3 lysine methyltransferase. *Cell*, 111, 117-27.

1118 ZHANG, X., YANG, Z., KHAN, S. I., HORTON, J. R., TAMARU, H., SELKER, E. U. & CHENG,  
1119 X. 2003. Structural basis for the product specificity of histone lysine  
1120 methyltransferases. *Mol Cell*, 12, 177-85.

1121 ZHANG, Y., PAK, C., HAN, Y., AHLENIUS, H., ZHANG, Z., CHANDA, S., MARRO, S.,  
1122 PATZKE, C., ACUNA, C., COVY, J., XU, W., YANG, N., DANKO, T., CHEN, L.,  
1123 WERNIG, M. & SUDHOF, T. C. 2013. Rapid single-step induction of functional  
1124 neurons from human pluripotent stem cells. *Neuron*, 78, 785-98.

1125 ZYLICZ, J. J., DIETMANN, S., GUNESDOGAN, U., HACKETT, J. A., COUGOT, D., LEE, C. &  
1126 SURANI, M. A. 2015. Chromatin dynamics and the role of G9a in gene  
1127 regulation and enhancer silencing during early mouse development. *Elife*, 4.  
1128

1129

1130

1131

1132

1133

1134

1135

1136

1137

1138

1139

Table 1 List of participants with ASD or unaffected controls, with the genetic variant(s) involved, and the different iPSC lines derived.

| Family ID                                    | MSSNG ID   | Status             | Primary genetic variant(s)                                                                        |                                  |                                        |                                                           | Other ASD implicated variants                                                                                                     | Sex | Age at reprog. (yr) | Cell of origin | Reprog. method | iPSC ID               | Reference                    |
|----------------------------------------------|------------|--------------------|---------------------------------------------------------------------------------------------------|----------------------------------|----------------------------------------|-----------------------------------------------------------|-----------------------------------------------------------------------------------------------------------------------------------|-----|---------------------|----------------|----------------|-----------------------|------------------------------|
|                                              |            |                    | Description                                                                                       | Type                             | Inheritance                            | Coordinates (hg19)                                        |                                                                                                                                   |     |                     |                |                |                       |                              |
| <b>ASD Candidate Gene - CNVs</b>             |            |                    |                                                                                                   |                                  |                                        |                                                           |                                                                                                                                   |     |                     |                |                |                       |                              |
| A                                            | 1-0019-002 | Unaffected father  | Family and study control                                                                          | ---                              | ---                                    | ---                                                       | ---                                                                                                                               | M   | 44                  | Skin           | Retro          | 19-2                  | Deneault <i>et al.</i> 2018  |
|                                              | 1-0019-004 | Proband            | 16p11.2 deletion syndrome/+                                                                       | Deletion                         | <i>de novo</i>                         | chr16:29584000-3020000del                                 | ---                                                                                                                               | M   | 15                  | Skin           | ---            | ---                   | Marshall <i>et al.</i> 2008  |
| B                                            | 3-0368-000 | Proband            | <i>NRXN1</i> 430kb deletion/+                                                                     | Deletion                         | <i>de novo</i>                         | chr2:50567944-51057790del                                 | ---                                                                                                                               | M   | 8                   | Skin           | Retro          | NR3                   | Tammimies <i>et al.</i> 2015 |
| C                                            | 1-0262-002 | Unaffected father  | Family control                                                                                    | ---                              | ---                                    | ---                                                       | 8p22-p21.3 823kb duplication/+<br><i>RNF148</i> p.R225X/+<br><i>CHD7</i> p.E1897K/+                                               | M   | 49                  | Skin           | Sendai         | 16K, 16N              | ---                          |
|                                              | 1-0262-003 | Proband            | <i>DLGAP2</i> 791kb duplication/+                                                                 | Duplication                      | <i>de novo</i>                         | chr8:704001-1535000dup                                    | 8p22-p21.3 823kb duplication/+, pat<br><i>RNF148</i> p.R225X/+, pat<br><i>CHD7</i> p.E1897K/+, pat<br><i>RAI1</i> p.G1864R/+, mat | M   | 10                  | Skin           | Sendai         | 15E, 15G              | Marshall <i>et al.</i> 2008  |
|                                              | 1-0262-004 | Affected brother   | Family control                                                                                    | ---                              | ---                                    | ---                                                       | 8p22-p21.3 823kb duplication/+, pat<br><i>RNF148</i> p.R225X/+, pat<br><i>CHD7</i> p.E1897K/+, pat<br><i>RAI1</i> p.G1864R/+, mat | M   | 14                  | Skin           | Sendai         | 17E, 17G              | ---                          |
| D                                            | 1-0582-002 | Unaffected father  | Family control                                                                                    | ---                              | ---                                    | ---                                                       | ---                                                                                                                               | M   | 37                  | Skin           | Sendai         | 26E, 26J              | ---                          |
|                                              | 1-0582-003 | Proband            | <i>CNTN5</i> 676kb deletion                                                                       | Deletion                         | Maternal                               | chr11:99477401-100157000del                               | ---                                                                                                                               | M   | 9                   | Skin           | Sendai         | 27H, 27N              | N/A                          |
| E                                            | 7-0058-003 | Proband            | <i>AGBL4</i> 323kb deletion/+                                                                     | Deletion                         | Paternal                               | chr1:49894000-50224000del                                 | 2q21.1 516kb duplication/+, <i>de novo</i><br><i>HTR3A</i> p.G148X/+, pat                                                         | M   | 4                   | Skin           | Sendai         | 36O, 36P              | N/A                          |
| <b>ASD Candidate Gene - SNVs</b>             |            |                    |                                                                                                   |                                  |                                        |                                                           |                                                                                                                                   |     |                     |                |                |                       |                              |
| F                                            | 2-1305-005 | Unaffected brother | Family control                                                                                    | ---                              | ---                                    | ---                                                       | ---                                                                                                                               | M   | 7                   | Skin           | Sendai         | 21H, 21P              | ---                          |
|                                              | 2-1305-003 | Proband            | <i>CAPRN1</i> p.Q399X/+                                                                           | Nonsense                         | <i>de novo</i>                         | chr11:34107924C>T                                         | <i>TCFL2</i> p.L601S/+, pat                                                                                                       | M   | 12                  | Skin           | Sendai         | 20C, 20E,<br>75G, 75H | Jiang <i>et al.</i> 2013     |
| G                                            | 2-1186-002 | Unaffected father  | Family control                                                                                    | ---                              | ---                                    | ---                                                       | ---                                                                                                                               | M   | 43                  | Blood          | Sendai         | 54E, 54G              | ---                          |
|                                              | 2-1186-003 | Proband            | <i>VIP</i> p.Y73X/+                                                                               | Nonsense                         | <i>de novo</i>                         | chr6:153075412T>A                                         | ---                                                                                                                               | M   | 12                  | Blood          | Sendai         | 53G, 53H              | Jiang <i>et al.</i> 2013     |
| H                                            | 2-1303-004 | Unaffected brother | Family control                                                                                    | ---                              | ---                                    | ---                                                       | ---                                                                                                                               | M   | 13                  | Skin           | Sendai         | 19A                   | ---                          |
|                                              | 2-1303-003 | Proband            | <i>ANOS1</i> p.R423X                                                                              | Nonsense                         | <i>de novo</i>                         | chrX:8522080G>A                                           | ---                                                                                                                               | M   | 19                  | Skin           | Sendai         | 18C, 18E              | Jiang <i>et al.</i> 2013     |
|                                              | 2-1303-003 | Corrected proband  | CRISPR-corrected <i>ANOS1</i> p.X423R                                                             | Corrected                        | ---                                    | ---                                                       | ---                                                                                                                               | M   | 19                  | Skin           | Sendai         | 18CW                  | ---                          |
| I                                            | 1-0273-002 | Unaffected father  | Family control                                                                                    | ---                              | ---                                    | ---                                                       | ---                                                                                                                               | M   | 45                  | Blood          | Sendai         | 51C, 51E              | ---                          |
|                                              | 1-0273-003 | Proband            | <i>THRA</i> p.R384C/+                                                                             | Missense                         | <i>de novo</i>                         | chr17:38245626C>T                                         | <i>IQSEC</i> p.P1104L, mat                                                                                                        | M   | 14                  | Blood          | Sendai         | 52A, 52C              | Yuen <i>et al.</i> 2015      |
| <b>Functional ASD Candidate Genes - SNVs</b> |            |                    |                                                                                                   |                                  |                                        |                                                           |                                                                                                                                   |     |                     |                |                |                       |                              |
| J                                            | 1-0494-005 | Unaffected brother | Family control                                                                                    | ---                              | ---                                    | ---                                                       | ---                                                                                                                               | M   | 12                  | Blood          | Sendai         | 50A, 50B,<br>50H      | ---                          |
|                                              | 1-0494-003 | Proband MZ twin    | <i>SET</i> c.112+1G>C/+                                                                           | Splice site                      | <i>de novo</i>                         | chr9:131446287G>C                                         | ---                                                                                                                               | M   | 9                   | Blood          | Sendai         | 48K, 48N              | N/A                          |
|                                              | 1-0494-004 | Affected MZ twin   | <i>SET</i> c.112+1G>C/+                                                                           | Splice site                      | <i>de novo</i>                         | chr9:131446287G>C                                         | ---                                                                                                                               | M   | 9                   | Blood          | Sendai         | 49H, 49G              | N/A                          |
| K                                            | 7-0254-001 | Unaffected mother  | <i>GLI3</i> p.G727R/+                                                                             | Missense                         | ---                                    | chr7:42007446C>T                                          | <i>LAMC3</i> p.S1474L/+                                                                                                           | F   | 37                  | Blood          | Sendai         | 64N, 64Q              | ---                          |
|                                              | 7-0254-002 | Unaffected father  | <i>GLI3</i> p.G465R/+                                                                             | Missense                         | ---                                    | chr7:42063171C>G                                          | <i>UNC79</i> p.R525Q/+                                                                                                            | M   | 41                  | Blood          | Sendai         | 63Q, 63T              | ---                          |
|                                              | 7-0254-003 | Proband            | <i>GLI3</i> p.G727R/+, mat<br><i>GLI3</i> p.G465R/+, pat<br><i>KIF21A</i> p.R1156G/+ (mosaic 23%) | Missense<br>Missense<br>Missense | Maternal<br>Paternal<br><i>de novo</i> | chr7:42007446C>T<br>chr7:42063171C>G<br>chr12:39716675T>C | <i>UNC79</i> p.R525Q/+, pat<br><i>LAMC3</i> , p.S1474L/+, mat                                                                     | F   | 7                   | Blood          | Sendai         | 62M, 62X              | N/A                          |
|                                              | 7-0254-004 | Affected brother   | <i>GLI3</i> p.G727R/+<br><i>GLI3</i> p.G465R/+                                                    | Missense<br>Missense             | Maternal<br>Paternal                   | chr7:42007446C>T<br>chr7:42063171C>G                      | <i>UNC79</i> p.R525Q/+, pat<br><i>LAMC3</i> p.S1474L/+, mat                                                                       | M   | 9                   | Blood          | Sendai         | 61I, 61K              | N/A                          |
|                                              | 6-0393-001 | Unaffected mother  | Family control                                                                                    | ---                              | ---                                    | ---                                                       | ---                                                                                                                               | F   | 54                  | Skin           | Sendai         | 37E                   | ---                          |
| L                                            | 6-0393-003 | Proband            | * <i>EHMT2</i> p.K1164Nfs/+<br><i>UBE2I</i> p.E78K/+                                              | Frameshift<br>Missense           | <i>de novo</i><br><i>de novo</i>       | chr6:31848002del<br>chr16:1370183G>A                      | ---                                                                                                                               | F   | 18                  | Skin           | Sendai         | 38B, 38E              | N/A                          |

\*The 1bp deletion in *EHMT2* would result in a frameshift 47 codons before the end of the protein and disruption of the stop-codon, potentially leading to the inclusion of a total of 221 incorrect amino acids.

Note that the genomic coordinates corresponding to the different genetic variants are presented in Table S1.

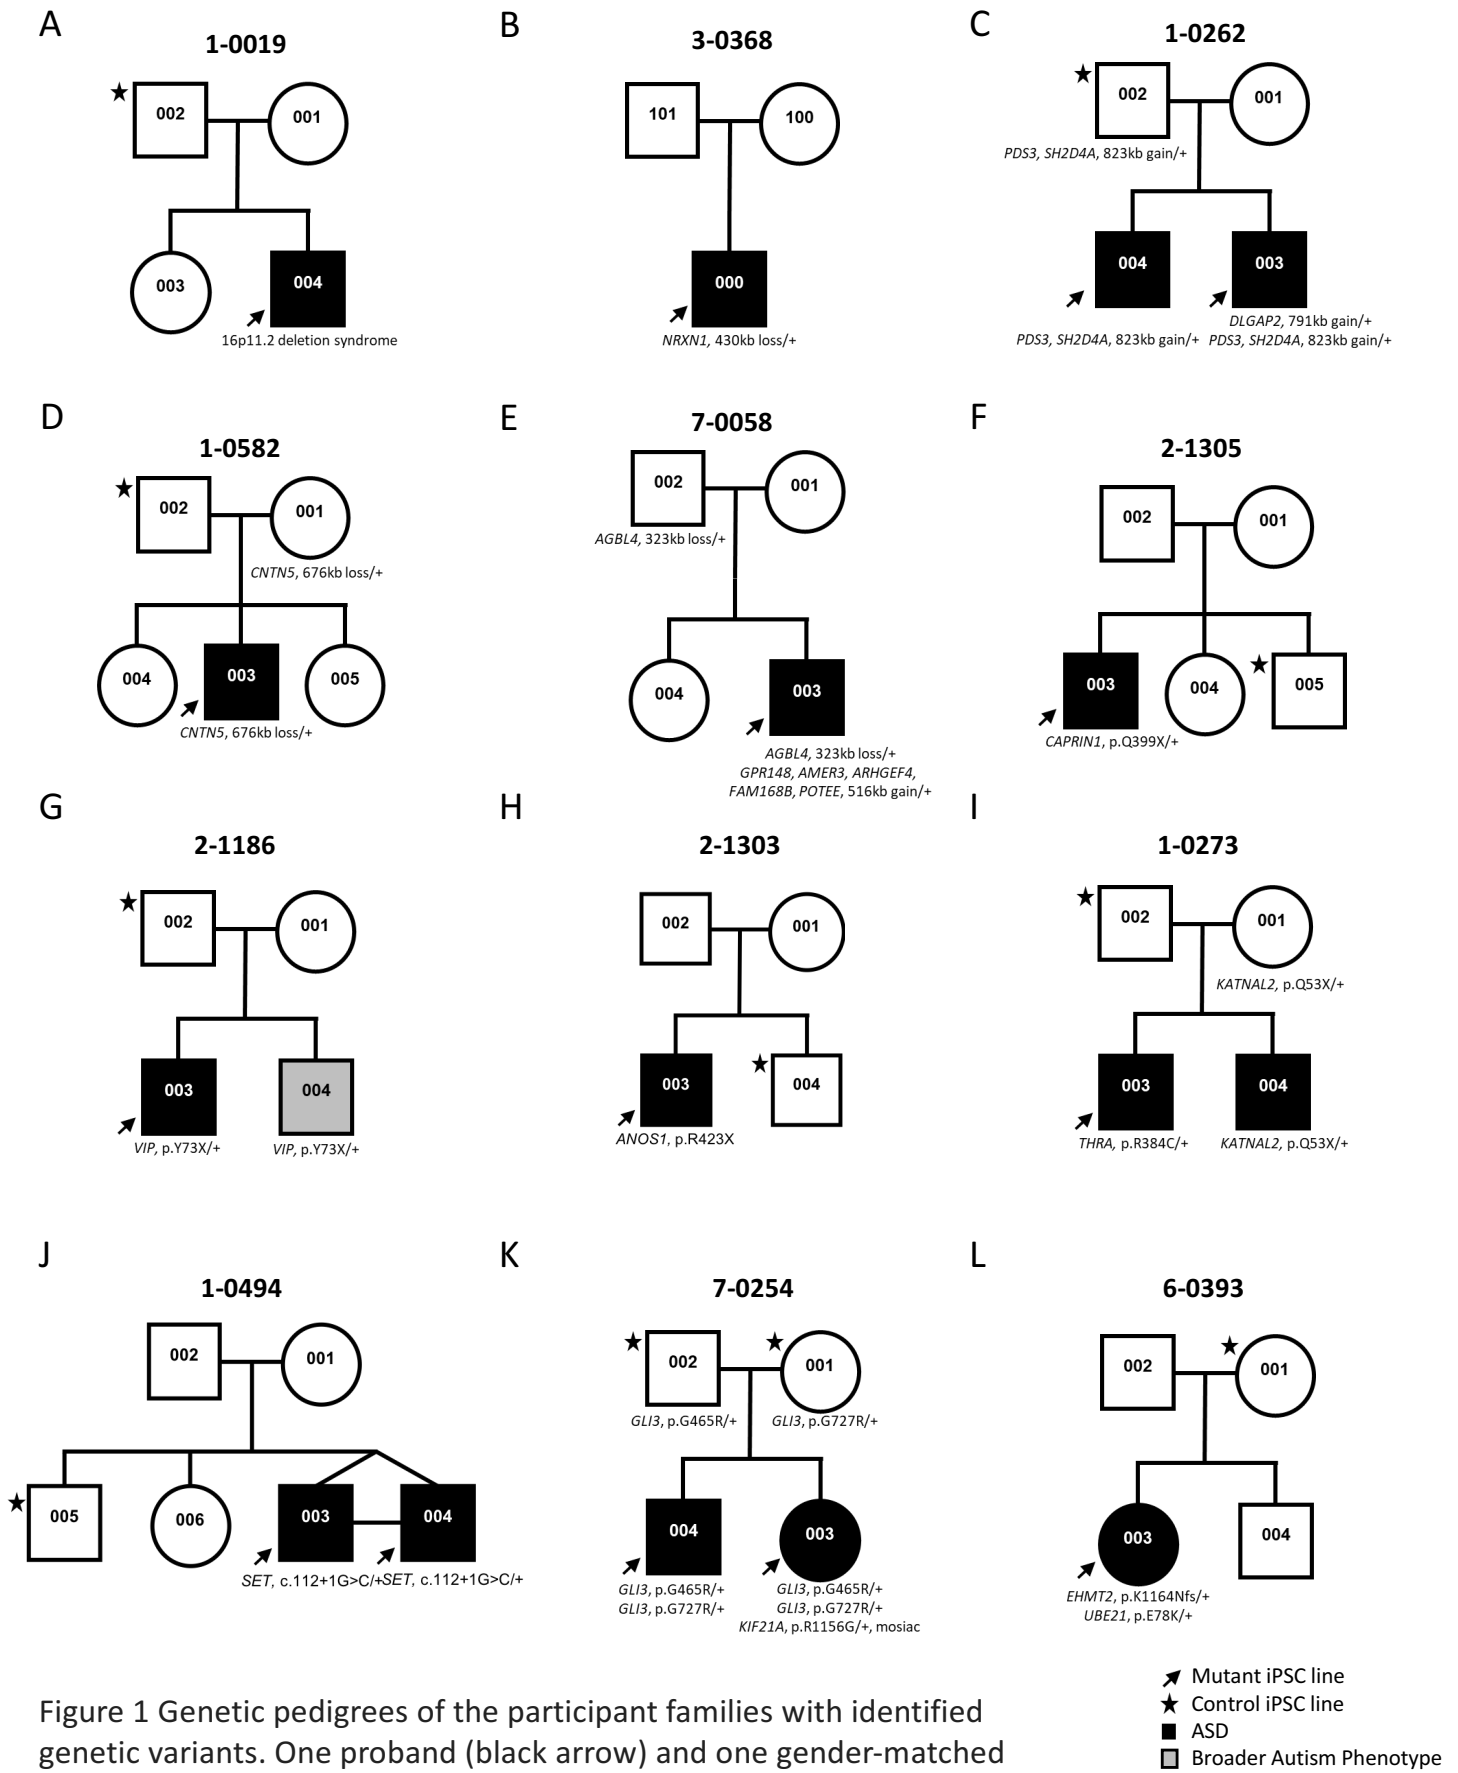

Figure 1 Genetic pedigrees of the participant families with identified genetic variants. One proband (black arrow) and one gender-matched unaffected member (black star) were typically selected for iPSC reprogramming. ASD-affected children are represented with a black box; note that line 1-0019-002 (19-2) in A) was used as a control and was described previously (Deneault et al., 2018).

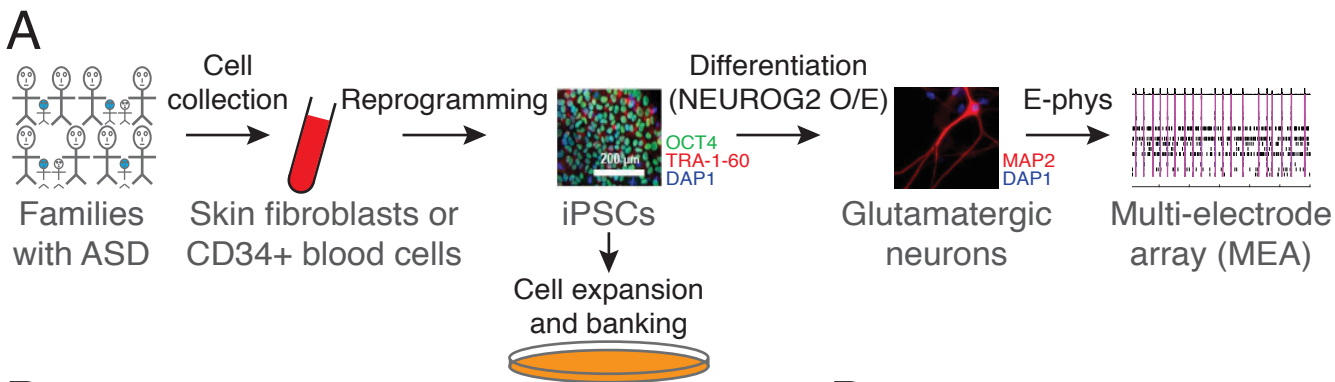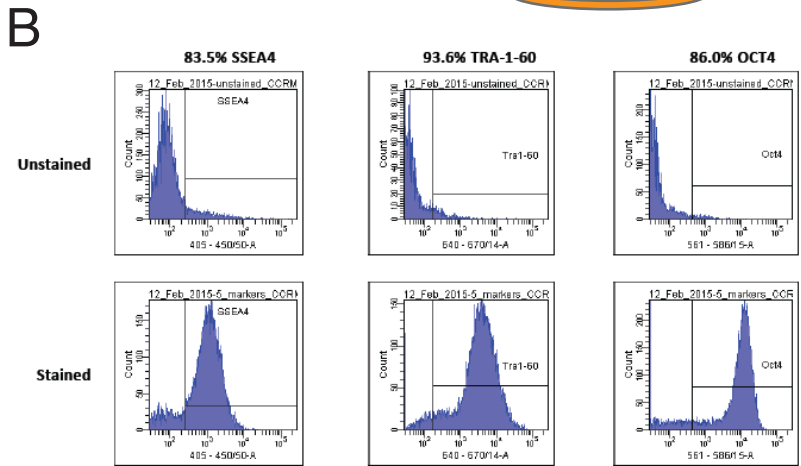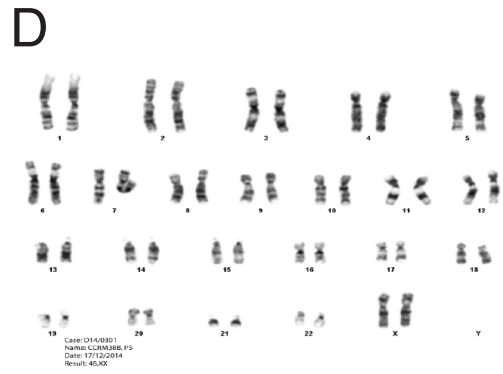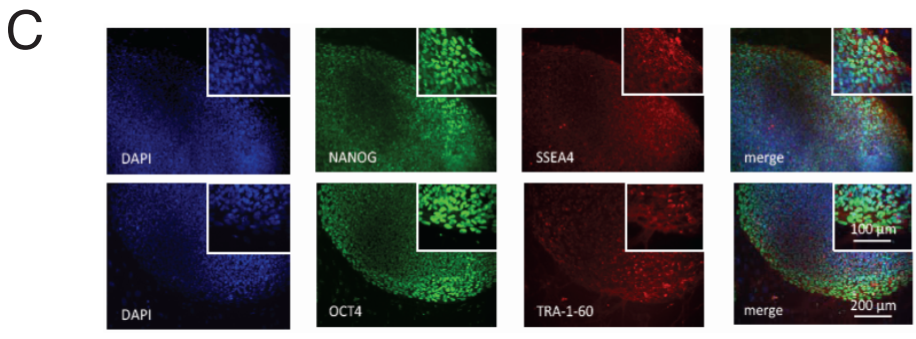

**Figure 2** Generation of iPSCs and neurons. (A) Schematic representation of the experimental procedure to find specific electrophysiological signatures associated with genetic variants of clinical significance to autism spectrum disorder (ASD). Fibroblasts or blood cells were reprogrammed into iPSCs from a cohort of 25 probands and unaffected family members. Differentiation of iPSCs into glutamatergic neurons was achieved with NEUROG2 7-day transient overexpression, and electrophysiological properties were monitored using a multi-electrode array (MEA) device. (B) Flow cytometry and (C) Immunohistochemistry revealing expression of the pluripotency markers NANOG, SSEA4, OCT4 and TRA-1-60 in a representative iPSC line. (D) Representative normal male karyotype in iPSC; 20 cells were examined.

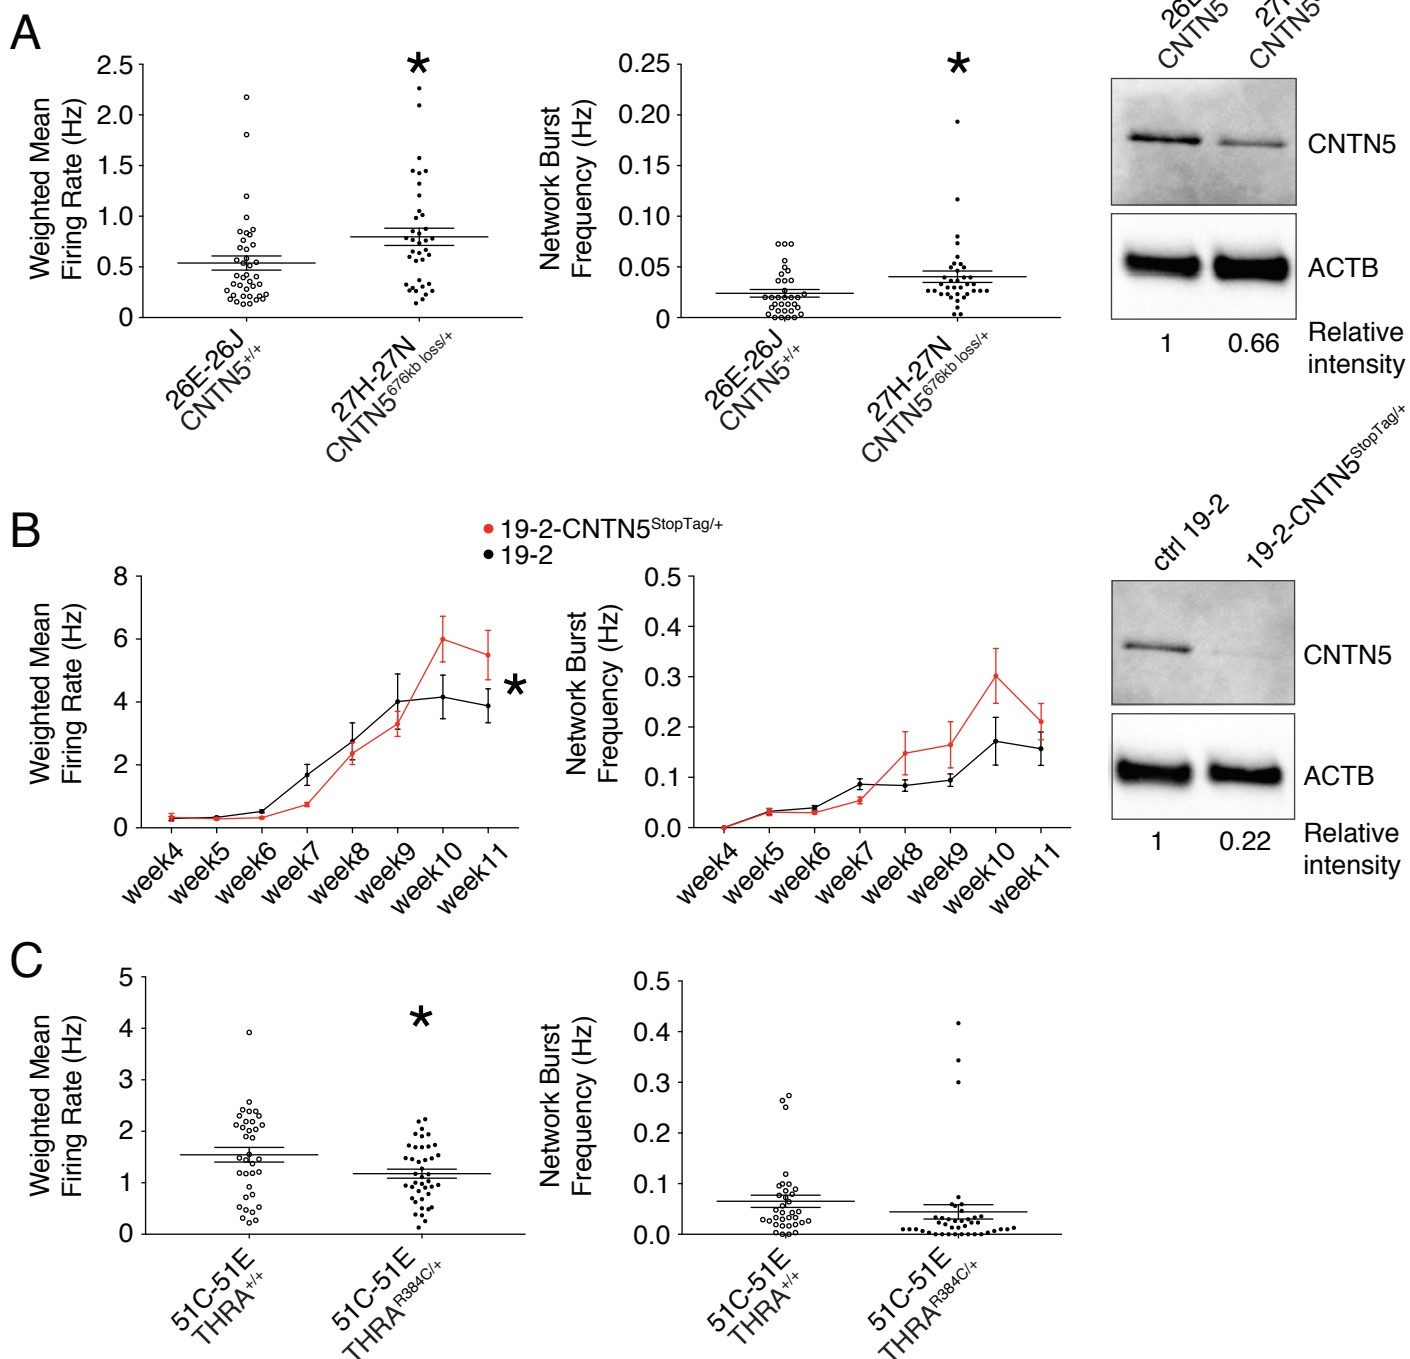

Figure 3 Multi-electrode array monitoring of iPSC-derived glutamatergic neurons. Weighted mean firing rate (MFR) and network burst frequency were recorded from (A) CNTN5 family at week 6 PNI, (B) CNTN5-isogenic pair 19-2 from week 4-11 PNI, and (C) THRA family NEUROG2-neurons at week 6 PNI; weighted MFR represents the MFR per active electrode; an electrode was considered active when a minimum of 5 spikes per minute were detected; a network burst was identified as a minimum of 10 spikes with a maximum inter-spike interval of 100 ms, occurring on at least 25% of electrodes per well; iPSC IDs and genotypes are indicated below each graph; values are presented as mean $\pm$ SEM of two different lines per participant, and of several technical and biological replicates, as presented in Table S3. Right panels show western blots revealing protein levels in mutant and control iPSC-derived neurons; actin beta (ACTB) was used as a loading control and the relative intensity of each band is indicated below the blots. \*  $p < 0.05$  from unpaired t test two-tailed (A and C), and from multiple t test comparison (B)

## ANOS1 (R423X)

probe sequences for ddPCR are underlined

gRNA-  
gRNA+

Genomic DNA (+ strand)

5'...CTCCCCTTTTCAAAGAT**TGACGACCCAC**TCGCCCGCTGGAAGTCGGAGCTCCCTTCTATCAGGAT...3'

ssODN (+ strand; 190 bp)

5'...CTCCCATTTCAAAGACGACGACCCACTCGGCCGCTGGAAGTCGGAGCTCCCTTCTATCAGGAT...3'

## B

### ANOS1 (R423X)

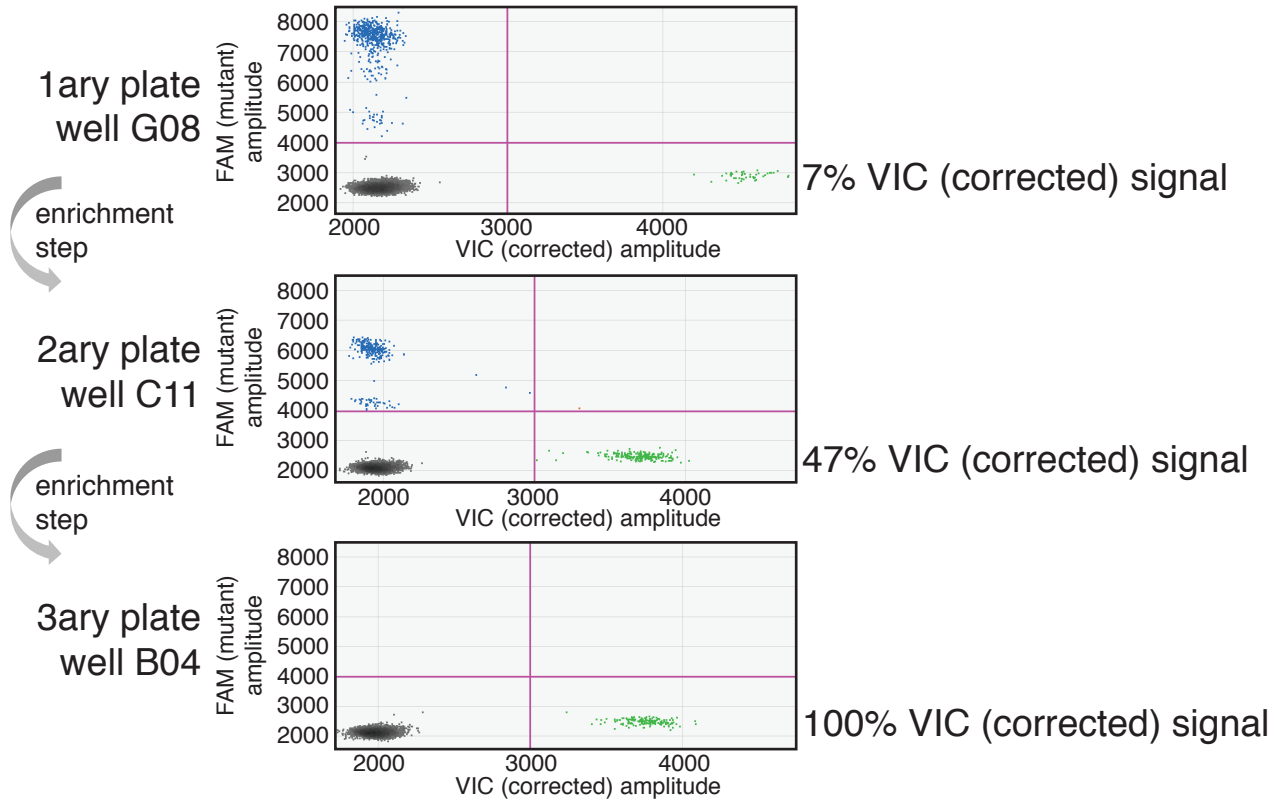

## C

Sanger sequencing 18CW

5'...CTCCCATTTCAAAGACGACGACCCACTCGGCCGCTGGAAGTCGGAGCTCCCTTCTATCAGGAT...3'

## D

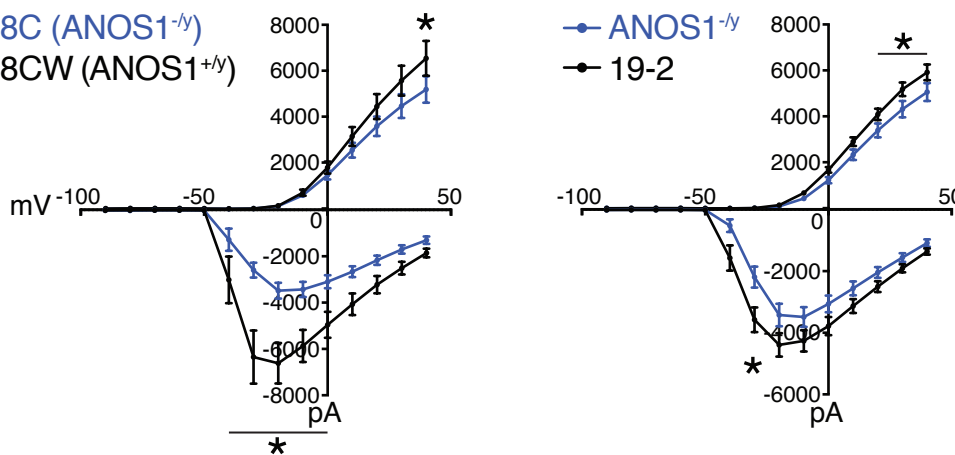

Figure 4 Correction of point mutation in ANOS1 in iPSCs using CRISPR editing. (A) Design of gRNAs, ssODNs and ddPCR probes for correction of R423X in ANOS1; one sgRNA for each genomic DNA strand, i.e., gRNA- in blue and gRNA+ in yellow, was devised in close proximity for the double-nicking system using Cas9D10A; the non-sense mutations in ANOS1 is depicted in bold red; a silent mutation was introduced in ssODN (in blue) for ddPCR probe (underlined) specificity and to prevent nicking. (B) ddPCR absolute quantification coupled with two consecutive limiting-dilution enrichment steps were necessary to isolate a 100% corrected line, i.e., 100% VIC signal. (C) Sanger sequencing confirmed proper correction of non-sense mutation R423X in line 18C back to wt; this newly corrected line was named 18CW. (D) Outward and inward membrane current detected by patch-clamp recordings; total number of recorded neurons was 15 for both 18C and 18CW, 20 for  $ANOS1^{-/-}$  and 33 for control 19-2; values are presented as mean $\pm$ SEM of three independent differentiation experiments, recorded at day 21-25 PNI. \*  $p < 0.05$  from multiple t test comparison



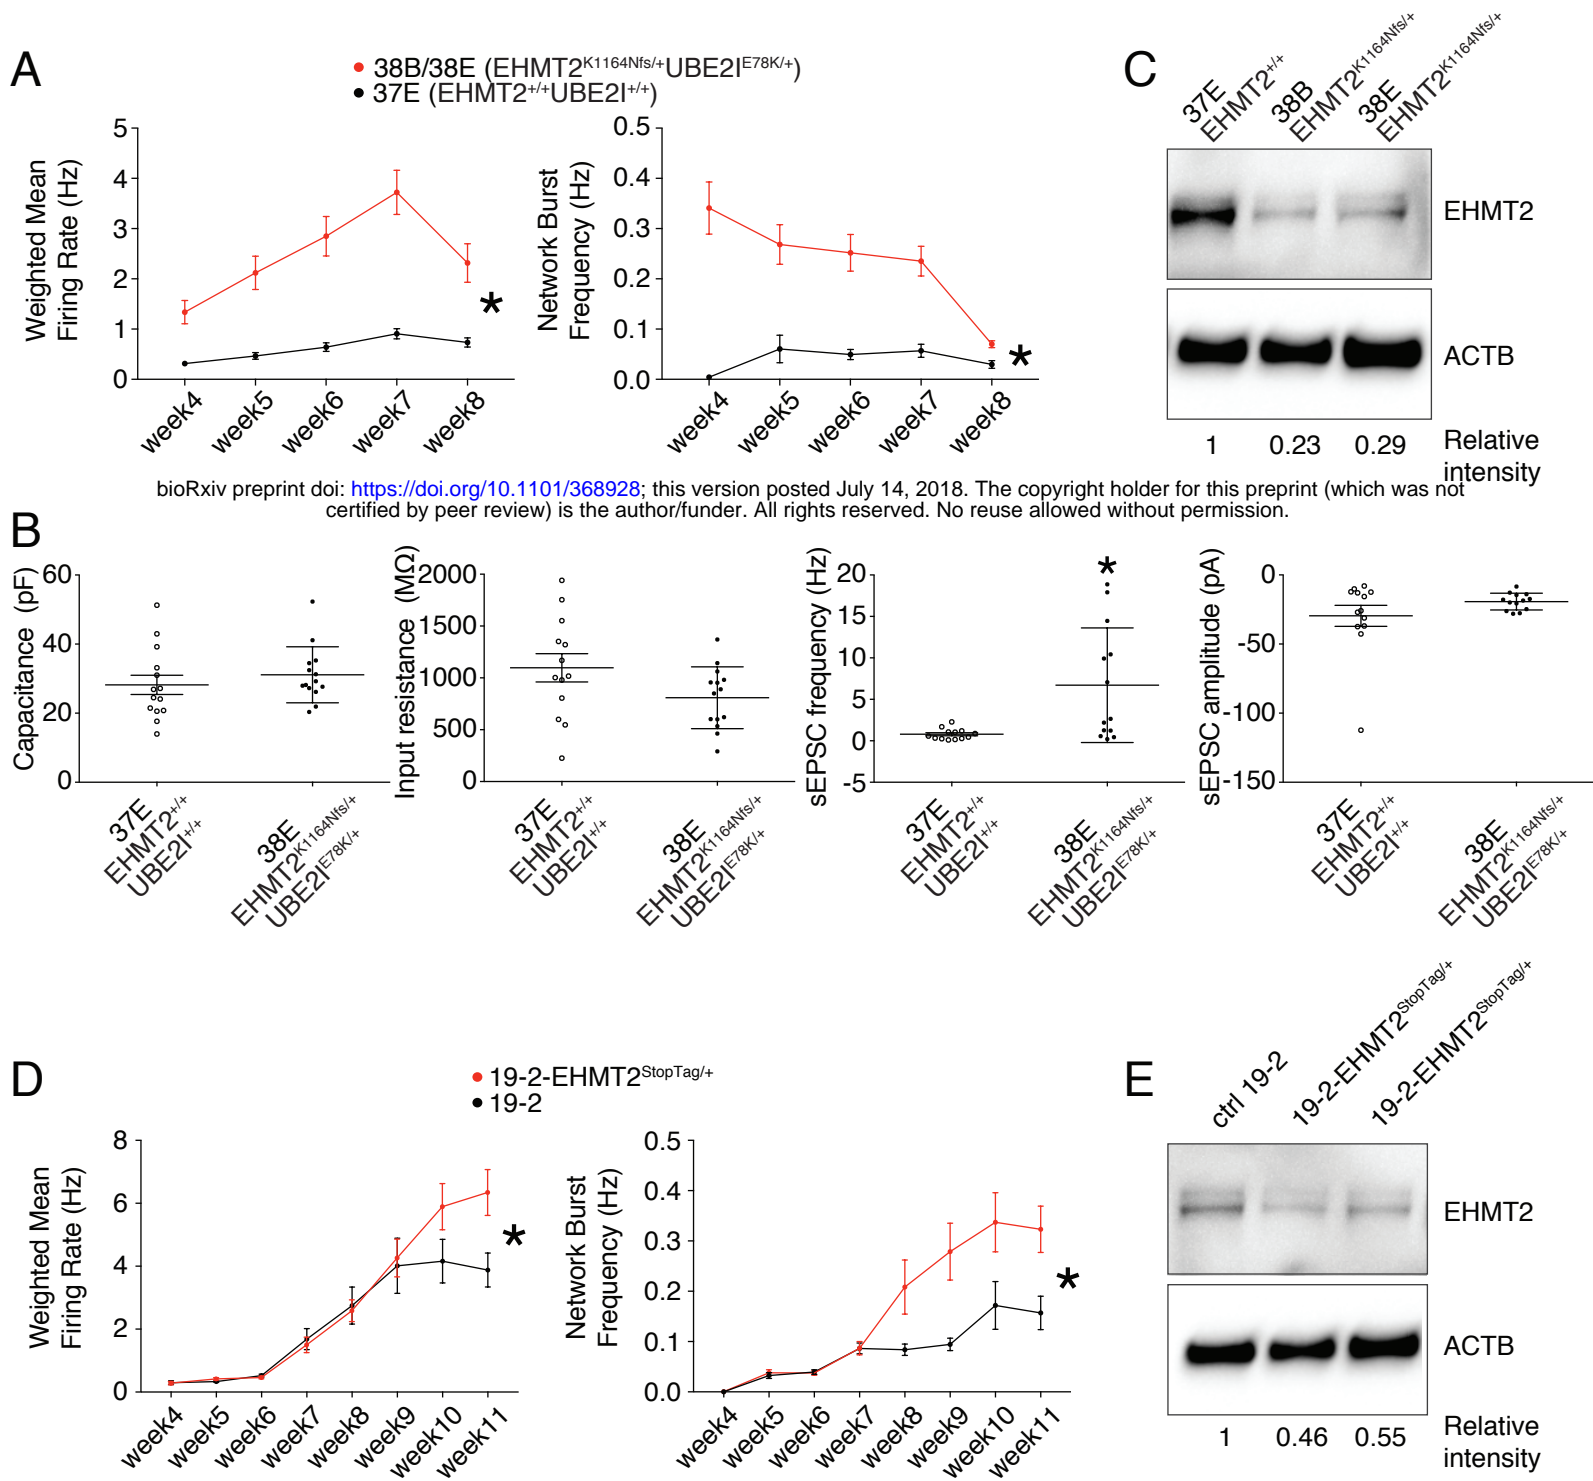

Figure 5 Electrophysiological and protein levels variations in EHMT2-deficient neurons. (A) Weighted mean firing rate (MFR) and network burst frequency were recorded using MEA from the EHMT2/UBE21 family from week 4-8 PNI; values are presented as mean $\pm$ SEM of several technical and biological replicates, as presented in Table S3; \*  $p < 0.05$  from multiple t test comparison. (B) Patch-clamp recordings of two selected lines, i.e., 37E (control) and 38E (mutant); values are presented as mean $\pm$ SEM of 14 different neurons from two independent differentiation experiments. \*  $p < 0.05$  from from unpaired t test two-tailed. (C) Western blot showing a decrease in EHMT2 protein levels in mutant neurons (38B and 38E) compared to their respective control neurons (37E); actin beta (ACTB) was used as a loading control and the relative intensity of each band is indicated below the blots. (D) MEA recordings of the isogenic pair 19-2 and 19-2-EHMT2<sup>StopTag/+</sup> iPSC-derived neurons from week 4-11 PNI; values are presented as mean $\pm$ SEM of eight different wells for each three independent differentiation experiments; \*  $p < 0.05$  from multiple t test comparison. (E) Western blot showing a decrease in EHMT2 protein levels in mutant neurons 19-2-EHMT2<sup>StopTag/+</sup> compared to their respective control (ctrl) neurons 19-2; ACTB was used as a loading control and the relative intensity of each band is indicated below the blots. pF = picofarad; MΩ = megaohm; Hz = hertz; pA = picoampere
